# Supplementary material
Source: publisher site journal article supplement (https://www.spandidos-publications.com/6383/downloadSupplementary)
Supplement: Supplementary file 1 [file downloadSupplementary]

## Sheet: Sheet1
Table SII. Co-expression genes GO/KEGG analysis of SLAMF1/4/7/8.
ONTOLOGY	ID	Description	GeneRatio	P.adjust	GeneID	Count
BP	GO:0050863	regulation of T cell activation	51/256	7.84656e-35	RAC2/SIT1/IFNG/RHOH/NOD2/CLECL1/LILRB1/CD74/LAG3/ICOS/HLA-DMA/PTPN22/LILRB2/SIRPG/PTPRC/TNFSF8/HLA-DPA1/CD2/PTPN6/TESPA1/VAV1/LAX1/SPN/CD3E/AIF1/CRTAM/IRF4/CCR2/HLA-DRA/HLA-DQA1/CD27/TNFAIP8L2/LAPTM5/LCK/CD4/NCKAP1L/HLA-DOB/CORO1A/IL12RB1/HLA-DPB1/CCL5/LILRB4/TOX/TIGIT/CD5/TNFSF13B/CD86/HLA-DMB/SASH3/RUNX3/CD6	51
BP	GO:0007159	leukocyte cell-cell adhesion	51/256	9.61956e-33	RAC2/IFNG/RHOH/NOD2/CLECL1/LILRB1/CD74/LAG3/FERMT3/ICOS/HLA-DMA/PTPN22/LILRB2/SIRPG/PTPRC/HLA-DPA1/PTPN6/TESPA1/VAV1/SELPLG/LAX1/SPN/CD3E/AIF1/ITGB2/CRTAM/CCR2/HLA-DRA/HLA-DQA1/CD27/TNFAIP8L2/LAPTM5/LCK/ITGAL/CD4/NCKAP1L/HLA-DOB/CORO1A/IL12RB1/HLA-DPB1/CCL5/LILRB4/TIGIT/SELL/CD5/TNFSF13B/CD86/HLA-DMB/SASH3/RUNX3/CD6	51
BP	GO:1903037	regulation of leukocyte cell-cell adhesion	46/256	2.29997e-29	IFNG/RHOH/NOD2/CLECL1/LILRB1/CD74/LAG3/ICOS/HLA-DMA/PTPN22/LILRB2/SIRPG/PTPRC/HLA-DPA1/PTPN6/TESPA1/VAV1/LAX1/SPN/CD3E/AIF1/ITGB2/CRTAM/CCR2/HLA-DRA/HLA-DQA1/CD27/TNFAIP8L2/LAPTM5/LCK/CD4/NCKAP1L/HLA-DOB/CORO1A/IL12RB1/HLA-DPB1/CCL5/LILRB4/TIGIT/CD5/TNFSF13B/CD86/HLA-DMB/SASH3/RUNX3/CD6	46
BP	GO:0002443	leukocyte mediated immunity	51/256	4.08945e-29	WAS/SPI1/RAC2/CD96/NOD2/LILRB1/CD74/LAG3/IL21R/HLA-DMA/PTPRC/MILR1/BATF/HLA-DPA1/FCGR1A/LTA/PTPN6/VAV1/LAT2/CD8A/SCIMP/TRBC2/SH2D1A/ITGB2/CRTAM/BTK/C1QA/CCR2/HLA-DRA/TRBC1/CLEC7A/HLA-DQA1/MYO1G/CD27/NCKAP1L/SLAMF6/FCER1G/HLA-DOB/CORO1A/IL12RB1/HLA-DPB1/CD84/C1QC/LILRB4/UNC13D/TLR8/SLA2/HLA-DMB/SASH3/C1QB/CD226	51
BP	GO:0030217	T cell differentiation	41/256	7.96902e-29	SPI1/EOMES/IFNG/RHOH/DOCK2/CD74/LAG3/CD3D/PTPN22/LILRB2/PTPRC/TNFSF8/GPR18/BATF/CD2/TESPA1/VAV1/CD8A/SPN/CD3E/THEMIS/CRTAM/IRF4/CCR2/HLA-DRA/CD3G/CD27/LCK/CD4/NCKAP1L/LY9/SLAMF6/FCER1G/IL12RB1/LILRB4/TOX/BCL11B/CD86/SASH3/RUNX3/ITK	41
BP	GO:0050867	positive regulation of cell activation	49/256	3.44487e-28	TLR6/IFNG/RHOH/NOD2/CLECL1/LILRB1/CD74/ICOS/HLA-DMA/PTPN22/LILRB2/SIRPG/PTPRC/PLEK/HLA-DPA1/CD2/PTPN6/TESPA1/VAV1/TRBC2/CD38/CD3E/AIF1/ITGB2/BTK/CCR2/HLA-DRA/TRBC1/CLEC7A/HLA-DQA1/CD27/LCK/CD4/NCKAP1L/HLA-DOB/CORO1A/IL12RB1/HLA-DPB1/CCL5/LILRB4/TOX/CD5/TNFSF13B/CD86/HLA-DMB/SASH3/RUNX3/CD6/CD226	49
BP	GO:0050870	positive regulation of T cell activation	38/256	3.44487e-28	IFNG/RHOH/NOD2/CLECL1/LILRB1/CD74/ICOS/HLA-DMA/PTPN22/LILRB2/SIRPG/PTPRC/HLA-DPA1/PTPN6/TESPA1/VAV1/CD3E/AIF1/CCR2/HLA-DRA/HLA-DQA1/CD27/LCK/CD4/NCKAP1L/HLA-DOB/CORO1A/IL12RB1/HLA-DPB1/CCL5/LILRB4/CD5/TNFSF13B/CD86/HLA-DMB/SASH3/RUNX3/CD6	38
BP	GO:0002696	positive regulation of leukocyte activation	48/256	5.90834e-28	TLR6/IFNG/RHOH/NOD2/CLECL1/LILRB1/CD74/ICOS/HLA-DMA/PTPN22/LILRB2/SIRPG/PTPRC/HLA-DPA1/CD2/PTPN6/TESPA1/VAV1/TRBC2/CD38/CD3E/AIF1/ITGB2/BTK/CCR2/HLA-DRA/TRBC1/CLEC7A/HLA-DQA1/CD27/LCK/CD4/NCKAP1L/HLA-DOB/CORO1A/IL12RB1/HLA-DPB1/CCL5/LILRB4/TOX/CD5/TNFSF13B/CD86/HLA-DMB/SASH3/RUNX3/CD6/CD226	48
BP	GO:1903039	positive regulation of leukocyte cell-cell adhesion	39/256	6.42633e-28	IFNG/RHOH/NOD2/CLECL1/LILRB1/CD74/ICOS/HLA-DMA/PTPN22/LILRB2/SIRPG/PTPRC/HLA-DPA1/PTPN6/TESPA1/VAV1/CD3E/AIF1/ITGB2/CCR2/HLA-DRA/HLA-DQA1/CD27/LCK/CD4/NCKAP1L/HLA-DOB/CORO1A/IL12RB1/HLA-DPB1/CCL5/LILRB4/CD5/TNFSF13B/CD86/HLA-DMB/SASH3/RUNX3/CD6	39
BP	GO:0030098	lymphocyte differentiation	46/256	7.7532e-28	SPI1/EOMES/IFNG/RHOH/DOCK2/CD74/LAG3/CD3D/PTPN22/LILRB2/PTPRC/TNFSF8/GPR18/BATF/CD2/PTPN6/TESPA1/VAV1/CD8A/SPN/CD3E/THEMIS/CRTAM/BTK/IRF4/CCR2/HLA-DRA/CD3G/CD27/LCK/CD4/NCKAP1L/LY9/SLAMF6/FCER1G/IL12RB1/LILRB4/TOX/IKZF1/IKZF3/BCL11B/TNFSF13B/CD86/SASH3/RUNX3/ITK	46
BP	GO:1903131	mononuclear cell differentiation	48/256	1.46564e-27	SPI1/EOMES/IFNG/RHOH/LILRB1/DOCK2/CD74/LAG3/CD3D/PTPN22/LILRB2/PTPRC/TNFSF8/GPR18/BATF/CD2/PTPN6/TESPA1/VAV1/CD8A/SPN/CD3E/THEMIS/CRTAM/BTK/IRF4/CCR2/HLA-DRA/CD3G/CD27/LCK/CD4/NCKAP1L/LY9/SLAMF6/FCER1G/IL12RB1/LILRB4/TOX/IKZF1/TRPM2/IKZF3/BCL11B/TNFSF13B/CD86/SASH3/RUNX3/ITK	48
BP	GO:0022407	regulation of cell-cell adhesion	49/256	1.46564e-27	SPI1/IFNG/RHOH/NOD2/CLECL1/LILRB1/CD74/LAG3/FERMT3/ICOS/HLA-DMA/PTPN22/LILRB2/SIRPG/PTPRC/HLA-DPA1/PTPN6/TESPA1/VAV1/LAX1/SPN/CD3E/AIF1/ITGB2/CRTAM/CCR2/HLA-DRA/HLA-DQA1/CD27/TNFAIP8L2/LAPTM5/LCK/CD4/NCKAP1L/AKNA/HLA-DOB/CORO1A/IL12RB1/HLA-DPB1/CCL5/LILRB4/TIGIT/CD5/TNFSF13B/CD86/HLA-DMB/SASH3/RUNX3/CD6	49
BP	GO:0002460	adaptive immune response based on somatic recombination of immune receptors built from immunoglobulin superfamily domains	44/256	2.08106e-26	WAS/IL18BP/NOD2/LILRB1/CD74/IL21R/HLA-DMA/PTPRC/BATF/HLA-DPA1/FCGR1A/LTA/PTPN6/CD8A/TRBC2/SPN/BTK/C1QA/IRF4/CCR2/HLA-DRA/TRBC1/CLEC7A/HLA-DQA1/MYO1G/CD27/CD4/NCKAP1L/LY9/SLAMF6/FCER1G/HLA-DOB/IL12RB1/HLA-DPB1/C1QC/LILRB4/UNC13D/TLR8/TNFSF13B/SLA2/HLA-DMB/SASH3/C1QB/CD226	44
BP	GO:0051251	positive regulation of lymphocyte activation	44/256	2.16783e-26	IFNG/RHOH/NOD2/CLECL1/LILRB1/CD74/ICOS/HLA-DMA/PTPN22/LILRB2/SIRPG/PTPRC/HLA-DPA1/PTPN6/TESPA1/VAV1/TRBC2/CD38/CD3E/AIF1/BTK/CCR2/HLA-DRA/TRBC1/CLEC7A/HLA-DQA1/CD27/LCK/CD4/NCKAP1L/HLA-DOB/CORO1A/IL12RB1/HLA-DPB1/CCL5/LILRB4/TOX/CD5/TNFSF13B/CD86/HLA-DMB/SASH3/RUNX3/CD6	44
BP	GO:0002449	lymphocyte mediated immunity	43/256	1.18347e-25	WAS/CD96/NOD2/LILRB1/CD74/LAG3/IL21R/HLA-DMA/PTPRC/BATF/HLA-DPA1/FCGR1A/LTA/PTPN6/VAV1/CD8A/TRBC2/SH2D1A/CRTAM/BTK/C1QA/CCR2/HLA-DRA/TRBC1/HLA-DQA1/MYO1G/CD27/NCKAP1L/SLAMF6/FCER1G/HLA-DOB/CORO1A/IL12RB1/HLA-DPB1/C1QC/LILRB4/UNC13D/TLR8/SLA2/HLA-DMB/SASH3/C1QB/CD226	43
BP	GO:0002764	immune response-regulating signaling pathway	48/256	1.42766e-25	BTLA/TLR6/FYB1/CD33/NOD2/LILRB1/LCP2/UBASH3A/PTPN22/LILRB2/CD200R1/PTPRC/CD300LF/GFI1/CD247/TRAT1/PTPN6/CTSS/TESPA1/VAV1/LAT2/CD8A/SCIMP/LAX1/TRBC2/HCK/CD38/LPXN/THEMIS/SH2D1A/BTK/IRF4/TRBC1/CLEC7A/MYO1G/LAPTM5/LCK/PRKCB/NCKAP1L/FCER1G/HLA-DPB1/LILRB4/TLR8/CD8B/SLA2/MICB/CD226/ITK	48
BP	GO:0022409	positive regulation of cell-cell adhesion	39/256	2.80116e-25	IFNG/RHOH/NOD2/CLECL1/LILRB1/CD74/ICOS/HLA-DMA/PTPN22/LILRB2/SIRPG/PTPRC/HLA-DPA1/PTPN6/TESPA1/VAV1/CD3E/AIF1/ITGB2/CCR2/HLA-DRA/HLA-DQA1/CD27/LCK/CD4/NCKAP1L/HLA-DOB/CORO1A/IL12RB1/HLA-DPB1/CCL5/LILRB4/CD5/TNFSF13B/CD86/HLA-DMB/SASH3/RUNX3/CD6	39
BP	GO:0002253	activation of immune response	42/256	1.06292e-23	FYB1/NOD2/LCP2/UBASH3A/PTPN22/PTPRC/CD247/TRAT1/PTPN6/TESPA1/VAV1/LAT2/CD8A/LAX1/ZBP1/TRBC2/HCK/CD38/LPXN/THEMIS/SH2D1A/BTK/C1QA/TRBC1/CLEC7A/MYO1G/LAPTM5/LCK/PRKCB/NCKAP1L/FCER1G/AIM2/PYHIN1/HLA-DPB1/C1QC/LILRB4/CD8B/SLA2/MICB/C1QB/CD226/ITK	42
BP	GO:0002768	immune response-regulating cell surface receptor signaling pathway	39/256	2.38805e-23	BTLA/FYB1/LILRB1/LCP2/UBASH3A/PTPN22/LILRB2/CD200R1/PTPRC/CD247/TRAT1/PTPN6/TESPA1/VAV1/LAT2/CD8A/LAX1/TRBC2/HCK/CD38/LPXN/THEMIS/SH2D1A/BTK/TRBC1/CLEC7A/MYO1G/LAPTM5/LCK/PRKCB/NCKAP1L/FCER1G/HLA-DPB1/LILRB4/CD8B/SLA2/MICB/CD226/ITK	39
BP	GO:0001819	positive regulation of cytokine production	44/256	4.49872e-22	MCOLN2/GBP5/TLR6/IFNG/NOD2/CLECL1/LILRB1/CD74/POU2F2/PTPN22/LILRB2/PTPRC/BATF/HLA-DPA1/CD2/LTA/SCIMP/SPN/CD3E/AIF1/GPSM3/CRTAM/IRF4/CCR2/CLEC7A/LAPTM5/CASP1/CD4/IL16/LY9/SLAMF6/FCER1G/IL12RB1/AIM2/PYHIN1/HLA-DPB1/CD84/TIGIT/TLR8/CD86/SASH3/CD6/CD226/ITK	44
BP	GO:0046631	alpha-beta T cell activation	28/256	2.89549e-21	EOMES/IFNG/LILRB1/DOCK2/WDFY4/PTPN22/PTPRC/TNFSF8/GPR18/BATF/SPN/CD3E/CRTAM/IRF4/CLEC4A/CCR2/HLA-DRA/NCKAP1L/LY9/SLAMF6/IL12RB1/LILRB4/TOX/BCL11B/CD86/SASH3/RUNX3/ITK	28
BP	GO:0002429	immune response-activating cell surface receptor signaling pathway	35/256	1.32892e-20	FYB1/LCP2/UBASH3A/PTPN22/PTPRC/CD247/TRAT1/PTPN6/TESPA1/VAV1/LAT2/CD8A/LAX1/TRBC2/HCK/CD38/LPXN/THEMIS/SH2D1A/BTK/TRBC1/CLEC7A/MYO1G/LAPTM5/LCK/PRKCB/NCKAP1L/FCER1G/HLA-DPB1/LILRB4/CD8B/SLA2/MICB/CD226/ITK	35
BP	GO:0002757	immune response-activating signal transduction	35/256	1.32892e-20	FYB1/LCP2/UBASH3A/PTPN22/PTPRC/CD247/TRAT1/PTPN6/TESPA1/VAV1/LAT2/CD8A/LAX1/TRBC2/HCK/CD38/LPXN/THEMIS/SH2D1A/BTK/TRBC1/CLEC7A/MYO1G/LAPTM5/LCK/PRKCB/NCKAP1L/FCER1G/HLA-DPB1/LILRB4/CD8B/SLA2/MICB/CD226/ITK	35
BP	GO:0002683	negative regulation of immune system process	40/256	3.02402e-20	SPI1/CD96/NOD2/LILRB1/CD74/LAG3/UBASH3A/PTPN22/SAMHD1/LILRB2/CD200R1/PTPRC/CD300LF/GPR18/MILR1/PDCD1/LST1/PTPN6/LAX1/HCK/SPN/LPXN/TBC1D10C/SH2D1A/GPR55/CRTAM/BTK/CCR2/TNFAIP8L2/LAPTM5/NCKAP1L/HLA-DOB/CD84/C1QC/LILRB4/TIGIT/CD86/SLA2/RUNX3/CST7	40
BP	GO:0045785	positive regulation of cell adhesion	40/256	1.72102e-19	IFNG/RHOH/NOD2/CLECL1/LILRB1/CD74/ICOS/HLA-DMA/PTPN22/LILRB2/SIRPG/PTPRC/HLA-DPA1/PTPN6/TESPA1/VAV1/CD3E/AIF1/ITGB2/CCR2/HLA-DRA/HLA-DQA1/CD27/LCK/CD4/NCKAP1L/HLA-DOB/CORO1A/IL12RB1/HLA-DPB1/CCL5/LILRB4/UNC13D/CD5/TNFSF13B/CD86/HLA-DMB/SASH3/RUNX3/CD6	40
BP	GO:0050670	regulation of lymphocyte proliferation	30/256	5.99329e-19	RAC2/CLECL1/LILRB1/CD74/PTPN22/LILRB2/PTPRC/TNFSF8/HLA-DPA1/LST1/PTPN6/CD38/SPN/CD3E/AIF1/CRTAM/BTK/CCR2/NCKAP1L/CORO1A/IL12RB1/HLA-DPB1/CCL5/LILRB4/IKZF3/TNFSF13B/CD86/HLA-DMB/SASH3/CD6	30
BP	GO:0032944	regulation of mononuclear cell proliferation	30/256	8.43913e-19	RAC2/CLECL1/LILRB1/CD74/PTPN22/LILRB2/PTPRC/TNFSF8/HLA-DPA1/LST1/PTPN6/CD38/SPN/CD3E/AIF1/CRTAM/BTK/CCR2/NCKAP1L/CORO1A/IL12RB1/HLA-DPB1/CCL5/LILRB4/IKZF3/TNFSF13B/CD86/HLA-DMB/SASH3/CD6	30
BP	GO:0002697	regulation of immune effector process	35/256	2.40921e-18	WAS/SPI1/RAC2/CD96/IFNG/NOD2/LILRB1/CD74/LAG3/PTPN22/PTPRC/LTA/PTPN6/VAV1/SCIMP/SH2D1A/ITGB2/CRTAM/BTK/IRF4/CCR2/HLA-DRA/CLEC7A/NCF1/LAPTM5/NCKAP1L/SLAMF6/IL12RB1/CD84/LILRB4/UNC13D/CD86/HLA-DMB/SASH3/CD226	35
BP	GO:0002274	myeloid leukocyte activation	29/256	8.30234e-18	SPI1/RAC2/TLR6/IFNG/RHOH/CD33/DOCK2/CD74/LCP2/PTPRC/CD300LF/MILR1/BATF/CD2/PTPN6/LAT2/AIF1/ITGB2/BTK/C1QA/IRF4/CCR2/FCER1G/CD84/CCL5/LILRB4/UNC13D/CST7/CD226	29
BP	GO:0070663	regulation of leukocyte proliferation	30/256	9.33484e-18	RAC2/CLECL1/LILRB1/CD74/PTPN22/LILRB2/PTPRC/TNFSF8/HLA-DPA1/LST1/PTPN6/CD38/SPN/CD3E/AIF1/CRTAM/BTK/CCR2/NCKAP1L/CORO1A/IL12RB1/HLA-DPB1/CCL5/LILRB4/IKZF3/TNFSF13B/CD86/HLA-DMB/SASH3/CD6	30
BP	GO:0043368	positive T cell selection	15/256	2.27495e-17	DOCK2/CD74/CD3D/PTPRC/BATF/SPN/CD3E/THEMIS/IRF4/CD3G/LY9/SLAMF6/IL12RB1/TOX/BCL11B	15
BP	GO:0002366	leukocyte activation involved in immune response	31/256	2.37514e-17	SPI1/EOMES/RAC2/IFNG/LILRB1/DOCK2/CD74/PTPRC/MILR1/BATF/PTPN6/LAT2/SPN/ITGB2/LCP1/BTK/IRF4/CCR2/HLA-DRA/CLEC7A/ITGAL/NCKAP1L/LY9/SLAMF6/FCER1G/CORO1A/IL12RB1/CD84/UNC13D/CD86/HLA-DMB	31
BP	GO:0050851	antigen receptor-mediated signaling pathway	29/256	3.0001e-17	FYB1/LCP2/UBASH3A/PTPN22/PTPRC/CD247/TRAT1/PTPN6/TESPA1/LAT2/CD8A/LAX1/TRBC2/CD38/LPXN/THEMIS/SH2D1A/BTK/TRBC1/LAPTM5/LCK/PRKCB/NCKAP1L/HLA-DPB1/LILRB4/CD8B/SLA2/CD226/ITK	29
BP	GO:0002263	cell activation involved in immune response	31/256	3.36564e-17	SPI1/EOMES/RAC2/IFNG/LILRB1/DOCK2/CD74/PTPRC/MILR1/BATF/PTPN6/LAT2/SPN/ITGB2/LCP1/BTK/IRF4/CCR2/HLA-DRA/CLEC7A/ITGAL/NCKAP1L/LY9/SLAMF6/FCER1G/CORO1A/IL12RB1/CD84/UNC13D/CD86/HLA-DMB	31
BP	GO:0002699	positive regulation of immune effector process	29/256	4.45065e-17	SPI1/RAC2/IFNG/NOD2/LILRB1/CD74/LAG3/PTPN22/PTPRC/LTA/PTPN6/VAV1/SCIMP/SH2D1A/ITGB2/CRTAM/BTK/CCR2/HLA-DRA/CLEC7A/LAPTM5/SLAMF6/IL12RB1/CD84/UNC13D/CD86/HLA-DMB/SASH3/CD226	29
BP	GO:0046651	lymphocyte proliferation	31/256	6.40249e-17	RAC2/CLECL1/LILRB1/DOCK2/CD74/PTPN22/LILRB2/PTPRC/TNFSF8/HLA-DPA1/LST1/PTPN6/CD38/SPN/CD3E/AIF1/CRTAM/BTK/CCR2/NCKAP1L/CORO1A/IL12RB1/HLA-DPB1/CCL5/LILRB4/IKZF3/TNFSF13B/CD86/HLA-DMB/SASH3/CD6	31
BP	GO:0042129	regulation of T cell proliferation	25/256	8.13184e-17	RAC2/CLECL1/LILRB1/PTPN22/LILRB2/PTPRC/TNFSF8/HLA-DPA1/PTPN6/SPN/CD3E/AIF1/CRTAM/CCR2/NCKAP1L/CORO1A/IL12RB1/HLA-DPB1/CCL5/LILRB4/TNFSF13B/CD86/HLA-DMB/SASH3/CD6	25
BP	GO:0002695	negative regulation of leukocyte activation	26/256	8.20409e-17	SPI1/LILRB1/CD74/LAG3/PTPN22/LILRB2/PTPRC/CD300LF/MILR1/LST1/PTPN6/LAX1/SPN/TBC1D10C/CRTAM/BTK/CCR2/TNFAIP8L2/LAPTM5/NCKAP1L/CD84/LILRB4/TIGIT/CD86/RUNX3/CST7	26
BP	GO:0032943	mononuclear cell proliferation	31/256	8.7411e-17	RAC2/CLECL1/LILRB1/DOCK2/CD74/PTPN22/LILRB2/PTPRC/TNFSF8/HLA-DPA1/LST1/PTPN6/CD38/SPN/CD3E/AIF1/CRTAM/BTK/CCR2/NCKAP1L/CORO1A/IL12RB1/HLA-DPB1/CCL5/LILRB4/IKZF3/TNFSF13B/CD86/HLA-DMB/SASH3/CD6	31
BP	GO:0045058	T cell selection	16/256	1.17636e-16	DOCK2/CD74/CD3D/PTPRC/BATF/SPN/CD3E/THEMIS/IRF4/CD3G/CD4/LY9/SLAMF6/IL12RB1/TOX/BCL11B	16
BP	GO:0042098	T cell proliferation	26/256	3.11227e-16	RAC2/CLECL1/LILRB1/DOCK2/PTPN22/LILRB2/PTPRC/TNFSF8/HLA-DPA1/PTPN6/SPN/CD3E/AIF1/CRTAM/CCR2/NCKAP1L/CORO1A/IL12RB1/HLA-DPB1/CCL5/LILRB4/TNFSF13B/CD86/HLA-DMB/SASH3/CD6	26
BP	GO:0002703	regulation of leukocyte mediated immunity	27/256	1.12457e-15	WAS/SPI1/RAC2/CD96/NOD2/LILRB1/LAG3/PTPRC/LTA/PTPN6/VAV1/SCIMP/SH2D1A/ITGB2/CRTAM/BTK/CCR2/HLA-DRA/CLEC7A/NCKAP1L/SLAMF6/IL12RB1/CD84/LILRB4/UNC13D/SASH3/CD226	27
BP	GO:0070661	leukocyte proliferation	31/256	1.22309e-15	RAC2/CLECL1/LILRB1/DOCK2/CD74/PTPN22/LILRB2/PTPRC/TNFSF8/HLA-DPA1/LST1/PTPN6/CD38/SPN/CD3E/AIF1/CRTAM/BTK/CCR2/NCKAP1L/CORO1A/IL12RB1/HLA-DPB1/CCL5/LILRB4/IKZF3/TNFSF13B/CD86/HLA-DMB/SASH3/CD6	31
BP	GO:0050866	negative regulation of cell activation	26/256	1.22309e-15	SPI1/LILRB1/CD74/LAG3/PTPN22/LILRB2/PTPRC/CD300LF/MILR1/LST1/PTPN6/LAX1/SPN/TBC1D10C/CRTAM/BTK/CCR2/TNFAIP8L2/LAPTM5/NCKAP1L/CD84/LILRB4/TIGIT/CD86/RUNX3/CST7	26
BP	GO:1902105	regulation of leukocyte differentiation	29/256	1.30761e-15	IFNG/RHOH/LILRB1/CD74/LAG3/EVI2B/LILRB2/PTPRC/CD2/PTPN6/TESPA1/GPR55/CRTAM/BTK/IRF4/CCR2/HLA-DRA/CD27/CD4/NCKAP1L/HCLS1/IL12RB1/C1QC/LILRB4/TOX/IKZF3/CD86/SASH3/RUNX3	29
BP	GO:0019724	B cell mediated immunity	26/256	1.65219e-15	NOD2/CD74/IL21R/HLA-DMA/PTPRC/BATF/HLA-DPA1/FCGR1A/LTA/PTPN6/TRBC2/BTK/C1QA/HLA-DRA/TRBC1/HLA-DQA1/CD27/FCER1G/HLA-DOB/HLA-DPB1/C1QC/TLR8/SLA2/HLA-DMB/C1QB/CD226	26
BP	GO:0050900	leukocyte migration	32/256	1.10132e-14	ASB2/MCOLN2/SPI1/RAC2/CXCL9/RHOH/NOD2/CD74/CD200R1/GPR18/CXCR3/VAV1/SELPLG/HCK/SPN/AIF1/GPSM3/ITGB2/CRTAM/CCR2/MYO1G/LCK/JAML/ITGAL/IL16/NCKAP1L/FCER1G/CORO1A/CCL5/CCR5/TRPM2/SELL	32
BP	GO:0016064	immunoglobulin mediated immune response	25/256	1.21827e-14	NOD2/CD74/IL21R/HLA-DMA/PTPRC/BATF/HLA-DPA1/FCGR1A/LTA/PTPN6/TRBC2/BTK/C1QA/HLA-DRA/TRBC1/HLA-DQA1/CD27/FCER1G/HLA-DOB/HLA-DPB1/C1QC/TLR8/HLA-DMB/C1QB/CD226	25
BP	GO:0036037	CD8-positive, alpha-beta T cell activation	12/256	2.23439e-14	EOMES/LILRB1/WDFY4/PTPN22/TNFSF8/GPR18/CRTAM/CLEC4A/NCKAP1L/LILRB4/TOX/RUNX3	12
BP	GO:0045619	regulation of lymphocyte differentiation	23/256	2.43659e-14	IFNG/RHOH/CD74/LAG3/LILRB2/PTPRC/CD2/PTPN6/TESPA1/CRTAM/BTK/IRF4/CCR2/HLA-DRA/CD27/NCKAP1L/IL12RB1/LILRB4/TOX/IKZF3/CD86/SASH3/RUNX3	23
BP	GO:0050852	T cell receptor signaling pathway	20/256	2.96852e-14	FYB1/LCP2/UBASH3A/PTPN22/PTPRC/CD247/TRAT1/PTPN6/TESPA1/CD8A/THEMIS/SH2D1A/LAPTM5/LCK/HLA-DPB1/LILRB4/CD8B/SLA2/CD226/ITK	20
BP	GO:0046632	alpha-beta T cell differentiation	19/256	3.18545e-14	EOMES/IFNG/TNFSF8/GPR18/BATF/SPN/IRF4/HLA-DRA/NCKAP1L/LY9/SLAMF6/IL12RB1/LILRB4/TOX/BCL11B/CD86/SASH3/RUNX3/ITK	19
BP	GO:0032609	interferon-gamma production	19/256	8.47692e-14	CD96/NOD2/LILRB1/PTPN22/HLA-DPA1/CD2/LTA/CD3E/CRTAM/CCR2/CLEC7A/LAPTM5/SLAMF6/IL12RB1/HLA-DPB1/LILRB4/TLR8/SASH3/CD226	19
BP	GO:0032649	regulation of interferon-gamma production	19/256	8.47692e-14	CD96/NOD2/LILRB1/PTPN22/HLA-DPA1/CD2/LTA/CD3E/CRTAM/CCR2/CLEC7A/LAPTM5/SLAMF6/IL12RB1/HLA-DPB1/LILRB4/TLR8/SASH3/CD226	19
BP	GO:0006909	phagocytosis	28/256	1.03271e-13	RAC2/IFNG/RHOH/NOD2/DOCK2/BIN2/SIRPG/PTPRC/CD300LF/FCGR1A/VAV1/ICAM3/TRBC2/IL2RB/HCK/AIF1/ITGB2/CCR2/TRBC1/CLEC7A/MYO1G/ITGAL/NCKAP1L/FCER1G/SH3BP1/CORO1A/UNC13D/IL2RG	28
BP	GO:0042102	positive regulation of T cell proliferation	18/256	1.19554e-13	CLECL1/PTPN22/LILRB2/PTPRC/HLA-DPA1/CD3E/AIF1/CCR2/NCKAP1L/CORO1A/IL12RB1/HLA-DPB1/CCL5/TNFSF13B/CD86/HLA-DMB/SASH3/CD6	18
BP	GO:1903706	regulation of hemopoiesis	30/256	1.89087e-13	SPI1/IFNG/RHOH/LILRB1/CD74/LAG3/EVI2B/LILRB2/PTPRC/CD2/PTPN6/TESPA1/GPR55/CRTAM/BTK/IRF4/CCR2/HLA-DRA/CD27/CD4/NCKAP1L/HCLS1/IL12RB1/C1QC/LILRB4/TOX/IKZF3/CD86/SASH3/RUNX3	30
BP	GO:0050671	positive regulation of lymphocyte proliferation	20/256	2.1046e-13	CLECL1/CD74/PTPN22/LILRB2/PTPRC/HLA-DPA1/CD38/CD3E/AIF1/CCR2/NCKAP1L/CORO1A/IL12RB1/HLA-DPB1/CCL5/TNFSF13B/CD86/HLA-DMB/SASH3/CD6	20
BP	GO:0032946	positive regulation of mononuclear cell proliferation	20/256	2.73288e-13	CLECL1/CD74/PTPN22/LILRB2/PTPRC/HLA-DPA1/CD38/CD3E/AIF1/CCR2/NCKAP1L/CORO1A/IL12RB1/HLA-DPB1/CCL5/TNFSF13B/CD86/HLA-DMB/SASH3/CD6	20
BP	GO:0045580	regulation of T cell differentiation	20/256	7.83019e-13	IFNG/RHOH/CD74/LAG3/LILRB2/PTPRC/CD2/TESPA1/CRTAM/IRF4/CCR2/HLA-DRA/CD27/NCKAP1L/IL12RB1/LILRB4/TOX/CD86/SASH3/RUNX3	20
BP	GO:0002440	production of molecular mediator of immune response	27/256	8.65117e-13	CD96/NOD2/LILRB1/CD74/HLA-DMA/PTPN22/TRAV19/SAMHD1/PTPRC/BATF/HLA-DPA1/TRAV2/SCIMP/BTK/CCR2/HLA-DRA/CLEC7A/HLA-DQA1/LAPTM5/HLA-DOB/HLA-DPB1/LILRB4/CD86/HLA-DMB/SASH3/TRAV9-2/CD226	27
BP	GO:0070665	positive regulation of leukocyte proliferation	20/256	1.83185e-12	CLECL1/CD74/PTPN22/LILRB2/PTPRC/HLA-DPA1/CD38/CD3E/AIF1/CCR2/NCKAP1L/CORO1A/IL12RB1/HLA-DPB1/CCL5/TNFSF13B/CD86/HLA-DMB/SASH3/CD6	20
BP	GO:0032729	positive regulation of interferon-gamma production	15/256	4.31869e-12	LILRB1/PTPN22/HLA-DPA1/CD2/LTA/CD3E/CRTAM/CCR2/CLEC7A/SLAMF6/IL12RB1/HLA-DPB1/TLR8/SASH3/CD226	15
BP	GO:0050854	regulation of antigen receptor-mediated signaling pathway	14/256	8.17583e-12	UBASH3A/PTPN22/PTPRC/TRAT1/PTPN6/TESPA1/LPXN/SH2D1A/LAPTM5/LCK/PRKCB/LILRB4/SLA2/CD226	14
BP	GO:0002706	regulation of lymphocyte mediated immunity	20/256	1.24713e-11	WAS/CD96/NOD2/LILRB1/LAG3/PTPRC/LTA/PTPN6/VAV1/SH2D1A/CRTAM/BTK/CCR2/HLA-DRA/NCKAP1L/SLAMF6/IL12RB1/LILRB4/SASH3/CD226	20
BP	GO:0002286	T cell activation involved in immune response	17/256	1.25173e-11	EOMES/IFNG/LILRB1/CD74/BATF/SPN/LCP1/IRF4/HLA-DRA/ITGAL/NCKAP1L/LY9/SLAMF6/FCER1G/IL12RB1/CD86/HLA-DMB	17
BP	GO:1902107	positive regulation of leukocyte differentiation	19/256	1.67133e-11	IFNG/RHOH/CD74/EVI2B/LILRB2/PTPRC/TESPA1/BTK/HLA-DRA/CD27/CD4/NCKAP1L/HCLS1/IL12RB1/LILRB4/TOX/CD86/SASH3/RUNX3	19
BP	GO:1903708	positive regulation of hemopoiesis	19/256	1.67133e-11	IFNG/RHOH/CD74/EVI2B/LILRB2/PTPRC/TESPA1/BTK/HLA-DRA/CD27/CD4/NCKAP1L/HCLS1/IL12RB1/LILRB4/TOX/CD86/SASH3/RUNX3	19
BP	GO:0002285	lymphocyte activation involved in immune response	21/256	1.75311e-11	SPI1/EOMES/IFNG/LILRB1/CD74/PTPRC/BATF/SPN/LCP1/IRF4/HLA-DRA/ITGAL/NCKAP1L/LY9/SLAMF6/FCER1G/CORO1A/IL12RB1/UNC13D/CD86/HLA-DMB	21
BP	GO:0051250	negative regulation of lymphocyte activation	19/256	2.56933e-11	LILRB1/CD74/LAG3/PTPN22/LILRB2/LST1/PTPN6/LAX1/SPN/TBC1D10C/CRTAM/BTK/TNFAIP8L2/LAPTM5/NCKAP1L/LILRB4/TIGIT/CD86/RUNX3	19
BP	GO:0045088	regulation of innate immune response	22/256	3.06244e-11	SPI1/GBP5/CD96/NOD2/LILRB1/LAG3/PTPN22/SAMHD1/PTPN6/VAV1/ZBP1/HCK/SH2D1A/CRTAM/CLEC7A/NCF1/SLAMF6/AIM2/PYHIN1/CCL5/TLR8/CD226	22
BP	GO:0019221	cytokine-mediated signaling pathway	31/256	3.06244e-11	SPI1/IL10RA/CXCL9/IFNG/LILRB1/CD74/IL21R/SAMHD1/LILRB2/PTPRC/CD300LF/CCR4/GFI1/CXCR3/PTPN6/CXCR6/ZBP1/IL2RB/HCK/CCR2/LAPTM5/CASP1/CD4/FCER1G/IL12RB1/AIM2/CCL5/CCR5/LILRB4/TNFSF13B/IL2RG	31
BP	GO:0019882	antigen processing and presentation	16/256	4.08124e-11	WAS/NOD2/CD74/WDFY4/HLA-DMA/LILRB2/HLA-DPA1/CTSS/CD8A/CLEC4A/HLA-DRA/HLA-DQA1/FCER1G/HLA-DOB/HLA-DPB1/HLA-DMB	16
BP	GO:0045621	positive regulation of lymphocyte differentiation	16/256	4.08124e-11	IFNG/RHOH/CD74/LILRB2/PTPRC/TESPA1/BTK/HLA-DRA/CD27/NCKAP1L/IL12RB1/LILRB4/TOX/CD86/SASH3/RUNX3	16
BP	GO:0002478	antigen processing and presentation of exogenous peptide antigen	11/256	6.71252e-11	CD74/HLA-DMA/HLA-DPA1/CTSS/CLEC4A/HLA-DRA/HLA-DQA1/FCER1G/HLA-DOB/HLA-DPB1/HLA-DMB	11
BP	GO:0002831	regulation of response to biotic stimulus	26/256	7.92747e-11	SPI1/GBP5/CD96/NOD2/LILRB1/LAG3/PTPN22/SAMHD1/PTPN6/VAV1/SCIMP/ZBP1/HCK/SH2D1A/CRTAM/CLEC7A/NCF1/APOBEC3G/SLAMF6/IL12RB1/AIM2/PYHIN1/CCL5/TLR8/MICB/CD226	26
BP	GO:0032103	positive regulation of response to external stimulus	29/256	8.20317e-11	SPI1/GBP5/RAC2/IFNG/NOD2/CD74/LAG3/CCR4/LTA/VAV1/SCIMP/ZBP1/HCK/AIF1/SH2D1A/GPSM3/CRTAM/BTK/CCR2/CLEC7A/CASP1/IL16/NCKAP1L/SLAMF6/AIM2/PYHIN1/CCL5/TLR8/CD226	29
BP	GO:0019886	antigen processing and presentation of exogenous peptide antigen via MHC class II	10/256	1.34037e-10	CD74/HLA-DMA/HLA-DPA1/CTSS/HLA-DRA/HLA-DQA1/FCER1G/HLA-DOB/HLA-DPB1/HLA-DMB	10
BP	GO:0002705	positive regulation of leukocyte mediated immunity	17/256	1.88356e-10	SPI1/NOD2/LAG3/PTPRC/LTA/VAV1/SCIMP/SH2D1A/ITGB2/CRTAM/BTK/HLA-DRA/CLEC7A/SLAMF6/IL12RB1/SASH3/CD226	17
BP	GO:0031349	positive regulation of defense response	23/256	3.43327e-10	SPI1/GBP5/IFNG/NOD2/LAG3/LTA/VAV1/ZBP1/HCK/SH2D1A/GPSM3/CRTAM/BTK/CCR2/CLEC7A/CASP1/IL16/SLAMF6/AIM2/PYHIN1/CCL5/TLR8/CD226	23
BP	GO:0050856	regulation of T cell receptor signaling pathway	11/256	3.68586e-10	UBASH3A/PTPN22/TRAT1/PTPN6/TESPA1/SH2D1A/LAPTM5/LCK/LILRB4/SLA2/CD226	11
BP	GO:0046634	regulation of alpha-beta T cell activation	15/256	3.73051e-10	IFNG/LILRB1/PTPN22/PTPRC/CD3E/CRTAM/IRF4/CCR2/HLA-DRA/NCKAP1L/IL12RB1/LILRB4/CD86/SASH3/RUNX3	15
BP	GO:0050868	negative regulation of T cell activation	16/256	4.20608e-10	LILRB1/CD74/LAG3/PTPN22/LILRB2/PTPN6/LAX1/SPN/CRTAM/TNFAIP8L2/LAPTM5/NCKAP1L/LILRB4/TIGIT/CD86/RUNX3	16
BP	GO:0002495	antigen processing and presentation of peptide antigen via MHC class II	10/256	5.1783e-10	CD74/HLA-DMA/HLA-DPA1/CTSS/HLA-DRA/HLA-DQA1/FCER1G/HLA-DOB/HLA-DPB1/HLA-DMB	10
BP	GO:0019884	antigen processing and presentation of exogenous antigen	11/256	7.69444e-10	CD74/HLA-DMA/HLA-DPA1/CTSS/CLEC4A/HLA-DRA/HLA-DQA1/FCER1G/HLA-DOB/HLA-DPB1/HLA-DMB	11
BP	GO:0001909	leukocyte mediated cytotoxicity	16/256	8.38475e-10	SPI1/LILRB1/LAG3/PTPRC/FCGR1A/PTPN6/VAV1/SH2D1A/CRTAM/HLA-DRA/NCKAP1L/SLAMF6/CORO1A/IL12RB1/UNC13D/CD226	16
BP	GO:0002504	antigen processing and presentation of peptide or polysaccharide antigen via MHC class II	10/256	9.46277e-10	CD74/HLA-DMA/HLA-DPA1/CTSS/HLA-DRA/HLA-DQA1/FCER1G/HLA-DOB/HLA-DPB1/HLA-DMB	10
BP	GO:0045582	positive regulation of T cell differentiation	14/256	9.54184e-10	IFNG/RHOH/CD74/LILRB2/PTPRC/TESPA1/HLA-DRA/CD27/NCKAP1L/IL12RB1/LILRB4/CD86/SASH3/RUNX3	14
BP	GO:0032623	interleukin-2 production	12/256	1.21008e-09	NOD2/LAG3/PTPRC/CD3E/IRF4/CCR2/CLEC7A/LAPTM5/CD4/LILRB4/CD86/SASH3	12
BP	GO:0032663	regulation of interleukin-2 production	12/256	1.21008e-09	NOD2/LAG3/PTPRC/CD3E/IRF4/CCR2/CLEC7A/LAPTM5/CD4/LILRB4/CD86/SASH3	12
BP	GO:0060326	cell chemotaxis	23/256	1.72656e-09	SPI1/RAC2/CXCL9/NOD2/BIN2/CD74/GPR18/CCR4/CXCR3/VAV1/CXCR6/AIF1/GPSM3/ITGB2/CCR2/JAML/IL16/NCKAP1L/FCER1G/CORO1A/CCL5/CCR5/TRPM2	23
BP	GO:0031343	positive regulation of cell killing	12/256	1.74431e-09	SPI1/IFNG/LAG3/PTPRC/VAV1/SH2D1A/CRTAM/HLA-DRA/CLEC7A/SLAMF6/IL12RB1/CD226	12
BP	GO:0043367	CD4-positive, alpha-beta T cell differentiation	13/256	2.04326e-09	IFNG/BATF/SPN/IRF4/HLA-DRA/NCKAP1L/LY9/SLAMF6/IL12RB1/TOX/CD86/SASH3/RUNX3	13
BP	GO:0001906	cell killing	18/256	2.05983e-09	SPI1/IFNG/LILRB1/LAG3/PTPRC/FCGR1A/PTPN6/VAV1/SH2D1A/CRTAM/HLA-DRA/CLEC7A/NCKAP1L/SLAMF6/CORO1A/IL12RB1/UNC13D/CD226	18
BP	GO:0031341	regulation of cell killing	14/256	2.07886e-09	SPI1/IFNG/LILRB1/LAG3/PTPRC/VAV1/SH2D1A/CRTAM/HLA-DRA/CLEC7A/NCKAP1L/SLAMF6/IL12RB1/CD226	14
BP	GO:0045089	positive regulation of innate immune response	16/256	2.07886e-09	SPI1/GBP5/NOD2/LAG3/VAV1/ZBP1/HCK/SH2D1A/CRTAM/CLEC7A/SLAMF6/AIM2/PYHIN1/CCL5/TLR8/CD226	16
BP	GO:0002819	regulation of adaptive immune response	18/256	2.60787e-09	WAS/NOD2/LILRB1/CD48/PTPRC/LTA/PTPN6/BTK/CCR2/HLA-DRA/CLEC7A/CD4/NCKAP1L/IL12RB1/LILRB4/TNFSF13B/SASH3/CD226	18
BP	GO:0046629	gamma-delta T cell activation	8/256	2.84345e-09	NOD2/LILRB1/PTPRC/GPR18/JAML/NCKAP1L/MICB/ITK	8
BP	GO:1903038	negative regulation of leukocyte cell-cell adhesion	16/256	3.09275e-09	LILRB1/CD74/LAG3/PTPN22/LILRB2/PTPN6/LAX1/SPN/CRTAM/TNFAIP8L2/LAPTM5/NCKAP1L/LILRB4/TIGIT/CD86/RUNX3	16
BP	GO:0006968	cellular defense response	11/256	3.30471e-09	CXCL9/FCMR/LILRB2/TRAT1/SPN/SH2D1A/CCR2/NCF1/LSP1/CCR5/ITK	11
BP	GO:0046635	positive regulation of alpha-beta T cell activation	12/256	3.3138e-09	IFNG/PTPN22/PTPRC/CD3E/CCR2/HLA-DRA/NCKAP1L/IL12RB1/LILRB4/CD86/SASH3/RUNX3	12
BP	GO:0032635	interleukin-6 production	17/256	4.99209e-09	TLR6/IFNG/NOD2/CD74/POU2F2/PTPN22/LILRB2/CD200R1/PTPN6/SCIMP/AIF1/CLEC7A/IL16/NCKAP1L/CD84/LILRB4/TLR8	17
BP	GO:0032675	regulation of interleukin-6 production	17/256	4.99209e-09	TLR6/IFNG/NOD2/CD74/POU2F2/PTPN22/LILRB2/CD200R1/PTPN6/SCIMP/AIF1/CLEC7A/IL16/NCKAP1L/CD84/LILRB4/TLR8	17
BP	GO:0002822	regulation of adaptive immune response based on somatic recombination of immune receptors built from immunoglobulin superfamily domains	17/256	5.4169e-09	WAS/NOD2/LILRB1/PTPRC/LTA/PTPN6/BTK/CCR2/HLA-DRA/CLEC7A/CD4/NCKAP1L/IL12RB1/LILRB4/TNFSF13B/SASH3/CD226	17
BP	GO:0043374	CD8-positive, alpha-beta T cell differentiation	7/256	5.73943e-09	EOMES/TNFSF8/GPR18/NCKAP1L/LILRB4/TOX/RUNX3	7
BP	GO:0045059	positive thymic T cell selection	7/256	5.73943e-09	DOCK2/CD74/CD3D/PTPRC/CD3E/CD3G/TOX	7
BP	GO:0022408	negative regulation of cell-cell adhesion	18/256	6.04175e-09	SPI1/LILRB1/CD74/LAG3/PTPN22/LILRB2/PTPN6/LAX1/SPN/CRTAM/TNFAIP8L2/LAPTM5/NCKAP1L/AKNA/LILRB4/TIGIT/CD86/RUNX3	18
BP	GO:0031295	T cell costimulation	10/256	8.59122e-09	ICOS/LILRB2/PTPN6/VAV1/CD3E/LCK/LILRB4/CD5/TNFSF13B/CD86	10
BP	GO:0002275	myeloid cell activation involved in immune response	13/256	8.88232e-09	SPI1/RAC2/IFNG/DOCK2/MILR1/PTPN6/LAT2/ITGB2/BTK/CCR2/FCER1G/CD84/UNC13D	13
BP	GO:0002833	positive regulation of response to biotic stimulus	17/256	9.5412e-09	SPI1/GBP5/NOD2/LAG3/VAV1/SCIMP/ZBP1/HCK/SH2D1A/CRTAM/CLEC7A/SLAMF6/AIM2/PYHIN1/CCL5/TLR8/CD226	17
BP	GO:0043299	leukocyte degranulation	12/256	9.75357e-09	SPI1/RAC2/MILR1/LAT2/HCK/ITGB2/BTK/CCR2/NCKAP1L/CORO1A/CD84/UNC13D	12
BP	GO:0031294	lymphocyte costimulation	10/256	1.3129e-08	ICOS/LILRB2/PTPN6/VAV1/CD3E/LCK/LILRB4/CD5/TNFSF13B/CD86	10
BP	GO:0030595	leukocyte chemotaxis	19/256	1.31899e-08	SPI1/RAC2/CXCL9/NOD2/CD74/GPR18/VAV1/AIF1/GPSM3/ITGB2/CCR2/JAML/IL16/NCKAP1L/FCER1G/CORO1A/CCL5/CCR5/TRPM2	19
BP	GO:0071706	tumor necrosis factor superfamily cytokine production	17/256	1.64505e-08	IFNG/CD33/NOD2/LILRB1/PTPN22/PTPRC/GPR18/CD2/PTPN6/SPN/CLEC4A/CCR2/CLEC7A/CD84/LILRB4/CD86/SASH3	17
BP	GO:1903555	regulation of tumor necrosis factor superfamily cytokine production	17/256	1.64505e-08	IFNG/CD33/NOD2/LILRB1/PTPN22/PTPRC/GPR18/CD2/PTPN6/SPN/CLEC4A/CCR2/CLEC7A/CD84/LILRB4/CD86/SASH3	17
BP	GO:0048002	antigen processing and presentation of peptide antigen	11/256	1.64505e-08	CD74/HLA-DMA/HLA-DPA1/CTSS/CLEC4A/HLA-DRA/HLA-DQA1/FCER1G/HLA-DOB/HLA-DPB1/HLA-DMB	11
BP	GO:0002399	MHC class II protein complex assembly	7/256	1.67901e-08	HLA-DMA/HLA-DPA1/HLA-DRA/HLA-DQA1/HLA-DOB/HLA-DPB1/HLA-DMB	7
BP	GO:0002503	peptide antigen assembly with MHC class II protein complex	7/256	1.67901e-08	HLA-DMA/HLA-DPA1/HLA-DRA/HLA-DQA1/HLA-DOB/HLA-DPB1/HLA-DMB	7
BP	GO:0045576	mast cell activation	11/256	2.27557e-08	RAC2/RHOH/LCP2/CD300LF/MILR1/PTPN6/LAT2/BTK/CD84/UNC13D/CD226	11
BP	GO:0035710	CD4-positive, alpha-beta T cell activation	13/256	2.60809e-08	IFNG/BATF/SPN/IRF4/HLA-DRA/NCKAP1L/LY9/SLAMF6/IL12RB1/TOX/CD86/SASH3/RUNX3	13
BP	GO:0001910	regulation of leukocyte mediated cytotoxicity	12/256	3.40506e-08	SPI1/LILRB1/LAG3/PTPRC/VAV1/SH2D1A/CRTAM/HLA-DRA/NCKAP1L/SLAMF6/IL12RB1/CD226	12
BP	GO:0050766	positive regulation of phagocytosis	11/256	5.90868e-08	IFNG/NOD2/DOCK2/SIRPG/PTPRC/CD300LF/IL2RB/CLEC7A/NCKAP1L/FCER1G/IL2RG	11
BP	GO:0032640	tumor necrosis factor production	16/256	7.96064e-08	IFNG/CD33/NOD2/LILRB1/PTPN22/PTPRC/GPR18/CD2/PTPN6/SPN/CLEC4A/CCR2/CLEC7A/CD84/LILRB4/SASH3	16
BP	GO:0032680	regulation of tumor necrosis factor production	16/256	7.96064e-08	IFNG/CD33/NOD2/LILRB1/PTPN22/PTPRC/GPR18/CD2/PTPN6/SPN/CLEC4A/CCR2/CLEC7A/CD84/LILRB4/SASH3	16
BP	GO:0002396	MHC protein complex assembly	7/256	1.009e-07	HLA-DMA/HLA-DPA1/HLA-DRA/HLA-DQA1/HLA-DOB/HLA-DPB1/HLA-DMB	7
BP	GO:0002501	peptide antigen assembly with MHC protein complex	7/256	1.009e-07	HLA-DMA/HLA-DPA1/HLA-DRA/HLA-DQA1/HLA-DOB/HLA-DPB1/HLA-DMB	7
BP	GO:0043373	CD4-positive, alpha-beta T cell lineage commitment	7/256	1.009e-07	BATF/SPN/IRF4/LY9/SLAMF6/IL12RB1/TOX	7
BP	GO:0001912	positive regulation of leukocyte mediated cytotoxicity	10/256	1.0151e-07	SPI1/LAG3/PTPRC/VAV1/SH2D1A/CRTAM/HLA-DRA/SLAMF6/IL12RB1/CD226	10
BP	GO:0002228	natural killer cell mediated immunity	11/256	1.0189e-07	CD96/LILRB1/LAG3/PTPN6/VAV1/SH2D1A/CRTAM/SLAMF6/CORO1A/UNC13D/CD226	11
BP	GO:0002292	T cell differentiation involved in immune response	11/256	1.16807e-07	EOMES/IFNG/BATF/SPN/IRF4/HLA-DRA/LY9/SLAMF6/FCER1G/IL12RB1/CD86	11
BP	GO:0002708	positive regulation of lymphocyte mediated immunity	13/256	1.31949e-07	NOD2/LAG3/PTPRC/LTA/VAV1/SH2D1A/CRTAM/BTK/HLA-DRA/SLAMF6/IL12RB1/SASH3/CD226	13
BP	GO:0042113	B cell activation	21/256	1.35692e-07	SPI1/NOD2/CD74/PTPRC/BATF/PTPN6/LAT2/LAX1/TRBC2/CD38/TBC1D10C/BTK/TRBC1/CD27/LAPTM5/PRKCB/NCKAP1L/IKZF3/TNFSF13B/CD86/SASH3	21
BP	GO:0007162	negative regulation of cell adhesion	20/256	1.38392e-07	SPI1/LILRB1/CD74/LAG3/PTPN22/LILRB2/PTPRC/PTPN6/LAX1/SPN/LPXN/CRTAM/TNFAIP8L2/LAPTM5/NCKAP1L/AKNA/LILRB4/TIGIT/CD86/RUNX3	20
BP	GO:0002718	regulation of cytokine production involved in immune response	12/256	1.62348e-07	CD96/NOD2/LILRB1/CD74/SCIMP/BTK/CCR2/CLEC7A/LAPTM5/LILRB4/SASH3/CD226	12
BP	GO:0002700	regulation of production of molecular mediator of immune response	15/256	1.68613e-07	CD96/NOD2/LILRB1/CD74/PTPN22/PTPRC/SCIMP/BTK/CCR2/CLEC7A/LAPTM5/LILRB4/CD86/SASH3/CD226	15
BP	GO:0050764	regulation of phagocytosis	12/256	1.79848e-07	IFNG/NOD2/DOCK2/SIRPG/PTPRC/CD300LF/IL2RB/HCK/CLEC7A/NCKAP1L/FCER1G/IL2RG	12
BP	GO:0050858	negative regulation of antigen receptor-mediated signaling pathway	8/256	1.92356e-07	UBASH3A/PTPN22/PTPN6/LPXN/SH2D1A/LAPTM5/LILRB4/SLA2	8
BP	GO:0002367	cytokine production involved in immune response	12/256	1.9534e-07	CD96/NOD2/LILRB1/CD74/SCIMP/BTK/CCR2/CLEC7A/LAPTM5/LILRB4/SASH3/CD226	12
BP	GO:0002363	alpha-beta T cell lineage commitment	7/256	1.9534e-07	BATF/SPN/IRF4/LY9/SLAMF6/IL12RB1/TOX	7
BP	GO:0043369	CD4-positive or CD8-positive, alpha-beta T cell lineage commitment	7/256	1.9534e-07	BATF/SPN/IRF4/LY9/SLAMF6/IL12RB1/TOX	7
BP	GO:0045061	thymic T cell selection	7/256	1.9534e-07	DOCK2/CD74/CD3D/PTPRC/CD3E/CD3G/TOX	7
BP	GO:0032743	positive regulation of interleukin-2 production	8/256	2.39846e-07	PTPRC/CD3E/IRF4/CCR2/CLEC7A/CD4/CD86/SASH3	8
BP	GO:0019722	calcium-mediated signaling	16/256	3.0787e-07	PTPRC/PLEK/CCR4/TRAT1/CXCR3/LAT2/CXCR6/CD3E/TBC1D10C/BTK/CCR2/CLEC7A/CD4/CCR5/TRPM2/SLA2	16
BP	GO:0007204	positive regulation of cytosolic calcium ion concentration	20/256	3.71967e-07	MCOLN2/CXCL9/GPR65/PTPRC/P2RY10/GPR18/CCR4/CXCR3/PTPN6/CXCR6/CD38/GPR174/GPR55/CCR2/LCK/FASLG/CORO1A/CCR5/TRPM2/CD52	20
BP	GO:0002704	negative regulation of leukocyte mediated immunity	10/256	3.825e-07	SPI1/CD96/NOD2/LILRB1/PTPRC/PTPN6/CCR2/NCKAP1L/CD84/LILRB4	10
BP	GO:0002287	alpha-beta T cell activation involved in immune response	10/256	4.371e-07	EOMES/IFNG/BATF/SPN/IRF4/HLA-DRA/LY9/SLAMF6/IL12RB1/CD86	10
BP	GO:0002293	alpha-beta T cell differentiation involved in immune response	10/256	4.371e-07	EOMES/IFNG/BATF/SPN/IRF4/HLA-DRA/LY9/SLAMF6/IL12RB1/CD86	10
BP	GO:0050853	B cell receptor signaling pathway	13/256	4.6282e-07	PTPN22/PTPRC/PTPN6/LAT2/TRBC2/CD38/LPXN/BTK/TRBC1/LCK/PRKCB/NCKAP1L/ITK	13
BP	GO:0050860	negative regulation of T cell receptor signaling pathway	7/256	5.03156e-07	UBASH3A/PTPN22/PTPN6/SH2D1A/LAPTM5/LILRB4/SLA2	7
BP	GO:0002824	positive regulation of adaptive immune response based on somatic recombination of immune receptors built from immunoglobulin superfamily domains	12/256	5.43571e-07	NOD2/PTPRC/LTA/BTK/CCR2/HLA-DRA/CLEC7A/CD4/IL12RB1/TNFSF13B/SASH3/CD226	12
BP	GO:0002456	T cell mediated immunity	12/256	6.61959e-07	WAS/NOD2/LILRB1/PTPRC/CD8A/CCR2/HLA-DRA/MYO1G/NCKAP1L/IL12RB1/LILRB4/SASH3	12
BP	GO:0042267	natural killer cell mediated cytotoxicity	10/256	7.43258e-07	LILRB1/LAG3/PTPN6/VAV1/SH2D1A/CRTAM/SLAMF6/CORO1A/UNC13D/CD226	10
BP	GO:0002377	immunoglobulin production	16/256	8.3455e-07	HLA-DMA/TRAV19/SAMHD1/PTPRC/BATF/HLA-DPA1/TRAV2/BTK/HLA-DRA/HLA-DQA1/HLA-DOB/HLA-DPB1/CD86/HLA-DMB/SASH3/TRAV9-2	16
BP	GO:0002381	immunoglobulin production involved in immunoglobulin-mediated immune response	10/256	8.3455e-07	HLA-DMA/PTPRC/BATF/HLA-DPA1/BTK/HLA-DRA/HLA-DQA1/HLA-DOB/HLA-DPB1/HLA-DMB	10
BP	GO:0032732	positive regulation of interleukin-1 production	10/256	8.3455e-07	GBP5/TLR6/IFNG/NOD2/CLEC7A/CASP1/IL16/AIM2/PYHIN1/TLR8	10
BP	GO:0002821	positive regulation of adaptive immune response	12/256	8.62858e-07	NOD2/PTPRC/LTA/BTK/CCR2/HLA-DRA/CLEC7A/CD4/IL12RB1/TNFSF13B/SASH3/CD226	12
BP	GO:0002295	T-helper cell lineage commitment	6/256	1.00484e-06	BATF/SPN/IRF4/LY9/SLAMF6/IL12RB1	6
BP	GO:0002360	T cell lineage commitment	7/256	1.12868e-06	BATF/SPN/IRF4/LY9/SLAMF6/IL12RB1/TOX	7
BP	GO:0032755	positive regulation of interleukin-6 production	11/256	1.28954e-06	TLR6/IFNG/NOD2/CD74/POU2F2/LILRB2/SCIMP/AIF1/CLEC7A/IL16/TLR8	11
BP	GO:0071216	cellular response to biotic stimulus	17/256	1.31978e-06	SPI1/TLR6/CXCL9/NOD2/LILRB1/PTPN22/LILRB2/GFI1/SCIMP/HCK/BTK/CLEC7A/CASP1/CCL5/CCR5/CD86/CD6	17
BP	GO:0002237	response to molecule of bacterial origin	20/256	1.36014e-06	SPI1/IL10RA/IL18BP/CD96/TLR6/CXCL9/NOD2/LILRB1/PTPN22/LILRB2/GFI1/LTA/SCIMP/HCK/CASP1/FASLG/CCL5/CCR5/CD86/CD6	20
BP	GO:0051480	regulation of cytosolic calcium ion concentration	20/256	1.4814e-06	MCOLN2/CXCL9/GPR65/PTPRC/P2RY10/GPR18/CCR4/CXCR3/PTPN6/CXCR6/CD38/GPR174/GPR55/CCR2/LCK/FASLG/CORO1A/CCR5/TRPM2/CD52	20
BP	GO:0097529	myeloid leukocyte migration	16/256	1.55376e-06	MCOLN2/SPI1/RAC2/CXCL9/RHOH/NOD2/CD74/CD200R1/VAV1/AIF1/ITGB2/CCR2/JAML/NCKAP1L/FCER1G/CCL5	16
BP	GO:0050864	regulation of B cell activation	15/256	1.55376e-06	NOD2/CD74/PTPRC/PTPN6/TRBC2/CD38/TBC1D10C/BTK/TRBC1/CD27/LAPTM5/NCKAP1L/IKZF3/TNFSF13B/SASH3	15
BP	GO:0001818	negative regulation of cytokine production	20/256	1.9937e-06	CD96/TLR6/IFNG/CD33/NOD2/LILRB1/LAG3/PTPN22/CD200R1/PTPRC/GPR18/PTPN6/BTK/CLEC4A/LAPTM5/NCKAP1L/CD84/LILRB4/TIGIT/TLR8	20
BP	GO:2001185	regulation of CD8-positive, alpha-beta T cell activation	6/256	2.03634e-06	LILRB1/PTPN22/CRTAM/NCKAP1L/LILRB4/RUNX3	6
BP	GO:0032731	positive regulation of interleukin-1 beta production	9/256	2.17703e-06	GBP5/TLR6/IFNG/NOD2/CLEC7A/CASP1/AIM2/PYHIN1/TLR8	9
BP	GO:0032496	response to lipopolysaccharide	19/256	2.37161e-06	SPI1/IL10RA/IL18BP/CD96/CXCL9/NOD2/LILRB1/PTPN22/LILRB2/GFI1/LTA/SCIMP/HCK/CASP1/FASLG/CCL5/CCR5/CD86/CD6	19
BP	GO:0032615	interleukin-12 production	9/256	2.46565e-06	IFNG/NOD2/LILRB1/SCIMP/CLEC7A/LAPTM5/IL16/TIGIT/TLR8	9
BP	GO:0032655	regulation of interleukin-12 production	9/256	2.46565e-06	IFNG/NOD2/LILRB1/SCIMP/CLEC7A/LAPTM5/IL16/TIGIT/TLR8	9
BP	GO:1990266	neutrophil migration	12/256	2.59051e-06	MCOLN2/RAC2/CXCL9/RHOH/NOD2/CD74/VAV1/ITGB2/JAML/NCKAP1L/FCER1G/CCL5	12
BP	GO:0032612	interleukin-1 production	12/256	2.78946e-06	GBP5/TLR6/IFNG/CD33/NOD2/CLEC7A/CASP1/IL16/AIM2/PYHIN1/LILRB4/TLR8	12
BP	GO:0032652	regulation of interleukin-1 production	12/256	2.78946e-06	GBP5/TLR6/IFNG/CD33/NOD2/CLEC7A/CASP1/IL16/AIM2/PYHIN1/LILRB4/TLR8	12
BP	GO:2000106	regulation of leukocyte apoptotic process	10/256	3.24486e-06	NOD2/LILRB1/CD74/PDCD1/BTK/CD3G/CD27/HCLS1/CCL5/CCR5	10
BP	GO:0071887	leukocyte apoptotic process	11/256	3.91459e-06	NOD2/LILRB1/CD74/PDCD1/BTK/CD3G/CD27/HCLS1/FASLG/CCL5/CCR5	11
BP	GO:0002294	CD4-positive, alpha-beta T cell differentiation involved in immune response	9/256	4.08022e-06	IFNG/BATF/SPN/IRF4/HLA-DRA/LY9/SLAMF6/IL12RB1/CD86	9
BP	GO:0046637	regulation of alpha-beta T cell differentiation	9/256	4.08022e-06	IFNG/IRF4/HLA-DRA/NCKAP1L/IL12RB1/LILRB4/CD86/SASH3/RUNX3	9
BP	GO:0032611	interleukin-1 beta production	11/256	4.20174e-06	GBP5/TLR6/IFNG/CD33/NOD2/CLEC7A/CASP1/AIM2/PYHIN1/LILRB4/TLR8	11
BP	GO:0032651	regulation of interleukin-1 beta production	11/256	4.20174e-06	GBP5/TLR6/IFNG/CD33/NOD2/CLEC7A/CASP1/AIM2/PYHIN1/LILRB4/TLR8	11
BP	GO:0006874	cellular calcium ion homeostasis	22/256	4.24941e-06	MCOLN2/CXCL9/GPR65/PTPRC/P2RY10/GPR18/CCR4/CXCR3/PTPN6/CXCR6/CD38/GPR174/GPR55/CCR2/LCK/PRKCB/FASLG/CORO1A/CCL5/CCR5/TRPM2/CD52	22
BP	GO:0002709	regulation of T cell mediated immunity	10/256	4.34149e-06	WAS/NOD2/LILRB1/PTPRC/CCR2/HLA-DRA/NCKAP1L/IL12RB1/LILRB4/SASH3	10
BP	GO:0043383	negative T cell selection	5/256	4.35684e-06	DOCK2/CD74/PTPRC/CD3E/THEMIS	5
BP	GO:0002715	regulation of natural killer cell mediated immunity	8/256	4.51022e-06	CD96/LILRB1/LAG3/VAV1/SH2D1A/CRTAM/SLAMF6/CD226	8
BP	GO:0043370	regulation of CD4-positive, alpha-beta T cell differentiation	8/256	4.51022e-06	IFNG/IRF4/HLA-DRA/NCKAP1L/IL12RB1/CD86/SASH3/RUNX3	8
BP	GO:0046638	positive regulation of alpha-beta T cell differentiation	8/256	4.51022e-06	IFNG/HLA-DRA/NCKAP1L/IL12RB1/LILRB4/CD86/SASH3/RUNX3	8
BP	GO:0034341	response to interferon-gamma	12/256	6.33345e-06	WAS/GBP5/IFNG/CD74/HLA-DPA1/CIITA/HCK/AIF1/CASP1/FASLG/IL12RB1/CCL5	12
BP	GO:0055074	calcium ion homeostasis	22/256	6.34854e-06	MCOLN2/CXCL9/GPR65/PTPRC/P2RY10/GPR18/CCR4/CXCR3/PTPN6/CXCR6/CD38/GPR174/GPR55/CCR2/LCK/PRKCB/FASLG/CORO1A/CCL5/CCR5/TRPM2/CD52	22
BP	GO:0072540	T-helper 17 cell lineage commitment	5/256	6.77778e-06	BATF/IRF4/LY9/SLAMF6/IL12RB1	5
BP	GO:0071219	cellular response to molecule of bacterial origin	15/256	7.76012e-06	SPI1/TLR6/CXCL9/NOD2/LILRB1/PTPN22/LILRB2/GFI1/SCIMP/HCK/CASP1/CCL5/CCR5/CD86/CD6	15
BP	GO:0002702	positive regulation of production of molecular mediator of immune response	11/256	9.56089e-06	NOD2/LILRB1/CD74/PTPN22/PTPRC/SCIMP/CLEC7A/LAPTM5/CD86/SASH3/CD226	11
BP	GO:0051056	regulation of small GTPase mediated signal transduction	17/256	9.96315e-06	FGD2/DOCK2/GPR65/P2RY10/GPR18/ARHGAP45/TAGAP/VAV1/GMIP/GPR174/ARHGAP9/GPR55/FGD3/SH3BP1/DEF6/ARHGAP30/CYTH4	17
BP	GO:0032753	positive regulation of interleukin-4 production	6/256	1.07301e-05	CLECL1/CD3E/IRF4/FCER1G/CD86/SASH3	6
BP	GO:0050777	negative regulation of immune response	13/256	1.3644e-05	SPI1/CD96/NOD2/LILRB1/SAMHD1/PTPRC/PDCD1/PTPN6/HCK/CCR2/NCKAP1L/CD84/LILRB4	13
BP	GO:0050857	positive regulation of antigen receptor-mediated signaling pathway	6/256	1.36486e-05	PTPRC/TRAT1/TESPA1/LCK/PRKCB/CD226	6
BP	GO:0033077	T cell differentiation in thymus	9/256	1.38671e-05	DOCK2/CD74/CD3D/PTPRC/TESPA1/CD3E/CD3G/TOX/BCL11B	9
BP	GO:0072503	cellular divalent inorganic cation homeostasis	22/256	1.49192e-05	MCOLN2/CXCL9/GPR65/PTPRC/P2RY10/GPR18/CCR4/CXCR3/PTPN6/CXCR6/CD38/GPR174/GPR55/CCR2/LCK/PRKCB/FASLG/CORO1A/CCL5/CCR5/TRPM2/CD52	22
BP	GO:0097530	granulocyte migration	12/256	1.65971e-05	MCOLN2/RAC2/CXCL9/RHOH/NOD2/CD74/VAV1/ITGB2/JAML/NCKAP1L/FCER1G/CCL5	12
BP	GO:0045954	positive regulation of natural killer cell mediated cytotoxicity	6/256	1.6913e-05	LAG3/VAV1/SH2D1A/CRTAM/SLAMF6/CD226	6
BP	GO:1900017	positive regulation of cytokine production involved in inflammatory response	6/256	1.6913e-05	GBP5/TLR6/NOD2/GPSM3/CLEC7A/CD6	6
BP	GO:0006911	phagocytosis, engulfment	11/256	1.73046e-05	RAC2/RHOH/BIN2/FCGR1A/TRBC2/AIF1/ITGB2/TRBC1/CLEC7A/NCKAP1L/SH3BP1	11
BP	GO:0002444	myeloid leukocyte mediated immunity	10/256	1.86845e-05	SPI1/RAC2/MILR1/FCGR1A/LAT2/ITGB2/BTK/CCR2/CD84/UNC13D	10
BP	GO:0071222	cellular response to lipopolysaccharide	14/256	2.07214e-05	SPI1/CXCL9/NOD2/LILRB1/PTPN22/LILRB2/GFI1/SCIMP/HCK/CASP1/CCL5/CCR5/CD86/CD6	14
BP	GO:0002685	regulation of leukocyte migration	14/256	2.17702e-05	SPI1/RAC2/RHOH/NOD2/CD74/CD200R1/GPR18/CXCR3/SPN/AIF1/GPSM3/CCR2/NCKAP1L/CCL5	14
BP	GO:0030593	neutrophil chemotaxis	10/256	2.19385e-05	RAC2/CXCL9/NOD2/CD74/VAV1/ITGB2/JAML/NCKAP1L/FCER1G/CCL5	10
BP	GO:1903557	positive regulation of tumor necrosis factor superfamily cytokine production	10/256	2.37973e-05	IFNG/NOD2/PTPRC/CD2/SPN/CCR2/CLEC7A/CD84/CD86/SASH3	10
BP	GO:0050727	regulation of inflammatory response	19/256	2.45086e-05	IFNG/NOD2/CD200R1/PTPRC/LTA/ZBP1/HCK/GPSM3/BTK/CCR2/TNFAIP8L2/NCF1/CASP1/IL16/AKNA/SIGLEC10/CCL5/AOAH/CST7	19
BP	GO:0050672	negative regulation of lymphocyte proliferation	9/256	2.45635e-05	LILRB1/LILRB2/LST1/PTPN6/SPN/CRTAM/BTK/LILRB4/CD86	9
BP	GO:0033003	regulation of mast cell activation	7/256	2.68896e-05	RAC2/CD300LF/MILR1/PTPN6/CD84/UNC13D/CD226	7
BP	GO:0032945	negative regulation of mononuclear cell proliferation	9/256	2.68896e-05	LILRB1/LILRB2/LST1/PTPN6/SPN/CRTAM/BTK/LILRB4/CD86	9
BP	GO:0030888	regulation of B cell proliferation	8/256	2.7793e-05	CD74/PTPRC/CD38/BTK/NCKAP1L/IKZF3/TNFSF13B/SASH3	8
BP	GO:0042269	regulation of natural killer cell mediated cytotoxicity	7/256	3.10005e-05	LILRB1/LAG3/VAV1/SH2D1A/CRTAM/SLAMF6/CD226	7
BP	GO:0042093	T-helper cell differentiation	8/256	3.10287e-05	BATF/SPN/IRF4/HLA-DRA/LY9/SLAMF6/IL12RB1/CD86	8
BP	GO:0099024	plasma membrane invagination	11/256	3.17421e-05	RAC2/RHOH/BIN2/FCGR1A/TRBC2/AIF1/ITGB2/TRBC1/CLEC7A/NCKAP1L/SH3BP1	11
BP	GO:2000514	regulation of CD4-positive, alpha-beta T cell activation	8/256	3.44353e-05	IFNG/IRF4/HLA-DRA/NCKAP1L/IL12RB1/CD86/SASH3/RUNX3	8
BP	GO:0002698	negative regulation of immune effector process	10/256	3.44353e-05	SPI1/CD96/NOD2/LILRB1/PTPRC/PTPN6/CCR2/NCKAP1L/CD84/LILRB4	10
BP	GO:0001774	microglial cell activation	7/256	3.51723e-05	TLR6/IFNG/PTPRC/AIF1/ITGB2/C1QA/CST7	7
BP	GO:0002507	tolerance induction	6/256	3.6857e-05	ICOS/LILRB2/CCR4/PDCD1/CD3E/LILRB4	6
BP	GO:0071674	mononuclear cell migration	13/256	3.93925e-05	ASB2/SPI1/CD200R1/SPN/AIF1/CRTAM/CCR2/MYO1G/JAML/ITGAL/CCL5/CCR5/TRPM2	13
BP	GO:0002720	positive regulation of cytokine production involved in immune response	8/256	4.24218e-05	NOD2/LILRB1/CD74/SCIMP/CLEC7A/LAPTM5/SASH3/CD226	8
BP	GO:0018108	peptidyl-tyrosine phosphorylation	18/256	4.24218e-05	IFNG/NOD2/CD74/PTPRC/FCGR1A/PTPN6/HCK/CD3E/ITGB2/BTK/CLEC7A/NCF1/LCK/CD4/HCLS1/CCL5/LILRB4/ITK	18
BP	GO:0002717	positive regulation of natural killer cell mediated immunity	6/256	4.38377e-05	LAG3/VAV1/SH2D1A/CRTAM/SLAMF6/CD226	6
BP	GO:0043372	positive regulation of CD4-positive, alpha-beta T cell differentiation	6/256	4.38377e-05	IFNG/HLA-DRA/NCKAP1L/IL12RB1/CD86/SASH3	6
BP	GO:0070664	negative regulation of leukocyte proliferation	9/256	4.46879e-05	LILRB1/LILRB2/LST1/PTPN6/SPN/CRTAM/BTK/LILRB4/CD86	9
BP	GO:0045055	regulated exocytosis	14/256	4.50617e-05	SPI1/RAC2/PLEK/MILR1/LAT2/HCK/ITGB2/BTK/CCR2/PRKCB/NCKAP1L/CORO1A/CD84/UNC13D	14
BP	GO:0043300	regulation of leukocyte degranulation	7/256	4.50617e-05	SPI1/RAC2/ITGB2/CCR2/NCKAP1L/CD84/UNC13D	7
BP	GO:0018212	peptidyl-tyrosine modification	18/256	4.61546e-05	IFNG/NOD2/CD74/PTPRC/FCGR1A/PTPN6/HCK/CD3E/ITGB2/BTK/CLEC7A/NCF1/LCK/CD4/HCLS1/CCL5/LILRB4/ITK	18
BP	GO:0019932	second-messenger-mediated signaling	16/256	4.61676e-05	PTPRC/PLEK/CCR4/TRAT1/CXCR3/LAT2/CXCR6/CD3E/TBC1D10C/BTK/CCR2/CLEC7A/CD4/CCR5/TRPM2/SLA2	16
BP	GO:0010324	membrane invagination	11/256	4.81646e-05	RAC2/RHOH/BIN2/FCGR1A/TRBC2/AIF1/ITGB2/TRBC1/CLEC7A/NCKAP1L/SH3BP1	11
BP	GO:0002269	leukocyte activation involved in inflammatory response	7/256	5.02552e-05	TLR6/IFNG/PTPRC/AIF1/ITGB2/C1QA/CST7	7
BP	GO:2000107	negative regulation of leukocyte apoptotic process	7/256	5.02552e-05	NOD2/LILRB1/CD74/CD27/HCLS1/CCL5/CCR5	7
BP	GO:0002431	Fc receptor mediated stimulatory signaling pathway	6/256	5.02552e-05	PTPRC/VAV1/HCK/MYO1G/FCER1G/CD226	6
BP	GO:0032633	interleukin-4 production	6/256	5.02552e-05	CLECL1/CD3E/IRF4/FCER1G/CD86/SASH3	6
BP	GO:0032673	regulation of interleukin-4 production	6/256	5.02552e-05	CLECL1/CD3E/IRF4/FCER1G/CD86/SASH3	6
BP	GO:0036336	dendritic cell migration	6/256	5.02552e-05	ASB2/SPI1/CCR2/CCL5/CCR5/TRPM2	6
BP	GO:0071346	cellular response to interferon-gamma	10/256	5.05141e-05	WAS/GBP5/IFNG/HLA-DPA1/HCK/AIF1/CASP1/FASLG/IL12RB1/CCL5	10
BP	GO:0002577	regulation of antigen processing and presentation	5/256	6.01564e-05	WAS/NOD2/CD74/LILRB2/HLA-DOB	5
BP	GO:0002279	mast cell activation involved in immune response	7/256	6.40807e-05	RAC2/MILR1/PTPN6/LAT2/BTK/CD84/UNC13D	7
BP	GO:0038093	Fc receptor signaling pathway	7/256	6.40807e-05	CD200R1/PTPRC/VAV1/HCK/BTK/MYO1G/FCER1G	7
BP	GO:0150076	neuroinflammatory response	8/256	6.67392e-05	TLR6/IFNG/CD200R1/PTPRC/AIF1/ITGB2/C1QA/CST7	8
BP	GO:0002532	production of molecular mediator involved in inflammatory response	9/256	7.05312e-05	GBP5/TLR6/NOD2/GPSM3/BTK/CLEC7A/NCF1/LILRB4/CD6	9
BP	GO:0002224	toll-like receptor signaling pathway	10/256	7.14471e-05	TLR6/NOD2/PTPN22/CD300LF/GFI1/CTSS/SCIMP/BTK/IRF4/TLR8	10
BP	GO:0050871	positive regulation of B cell activation	11/256	7.6164e-05	NOD2/CD74/PTPRC/TRBC2/CD38/BTK/TRBC1/CD27/NCKAP1L/TNFSF13B/SASH3	11
BP	GO:0002688	regulation of leukocyte chemotaxis	10/256	7.6164e-05	SPI1/RAC2/NOD2/CD74/GPR18/AIF1/GPSM3/CCR2/NCKAP1L/CCL5	10
BP	GO:0061900	glial cell activation	7/256	8.08479e-05	TLR6/IFNG/PTPRC/AIF1/ITGB2/C1QA/CST7	7
BP	GO:0045066	regulatory T cell differentiation	6/256	8.15732e-05	IFNG/LAG3/LILRB2/HLA-DRA/LILRB4/TOX	6
BP	GO:0006887	exocytosis	17/256	8.42944e-05	SPI1/RAC2/IFNG/PLEK/MILR1/LAT2/HCK/ITGB2/BTK/CCR2/MYO1G/PRKCB/NCKAP1L/CORO1A/CD84/CCL5/UNC13D	17
BP	GO:0002707	negative regulation of lymphocyte mediated immunity	7/256	9.04595e-05	CD96/NOD2/LILRB1/PTPRC/PTPN6/NCKAP1L/LILRB4	7
BP	GO:0045730	respiratory burst	6/256	9.50937e-05	NCF1B/RAC2/HCK/CLEC7A/NCF1/CD52	6
BP	GO:0032720	negative regulation of tumor necrosis factor production	8/256	9.56873e-05	CD33/NOD2/LILRB1/PTPN22/GPR18/PTPN6/CLEC4A/LILRB4	8
BP	GO:0071621	granulocyte chemotaxis	10/256	9.76848e-05	RAC2/CXCL9/NOD2/CD74/VAV1/ITGB2/JAML/NCKAP1L/FCER1G/CCL5	10
BP	GO:0002765	immune response-inhibiting signal transduction	4/256	9.76848e-05	CD33/LILRB1/LILRB2/LILRB4	4
BP	GO:0045060	negative thymic T cell selection	4/256	9.76848e-05	DOCK2/CD74/PTPRC/CD3E	4
BP	GO:0046643	regulation of gamma-delta T cell activation	4/256	9.76848e-05	NOD2/LILRB1/PTPRC/NCKAP1L	4
BP	GO:0032677	regulation of interleukin-8 production	9/256	0.000100682	TLR6/CD33/NOD2/CD74/PTPN22/PTPRC/CD2/CLEC7A/TLR8	9
BP	GO:0032637	interleukin-8 production	9/256	0.000108175	TLR6/CD33/NOD2/CD74/PTPN22/PTPRC/CD2/CLEC7A/TLR8	9
BP	GO:0032760	positive regulation of tumor necrosis factor production	9/256	0.000108175	IFNG/NOD2/PTPRC/CD2/SPN/CCR2/CLEC7A/CD84/SASH3	9
BP	GO:1903556	negative regulation of tumor necrosis factor superfamily cytokine production	8/256	0.000112284	CD33/NOD2/LILRB1/PTPN22/GPR18/PTPN6/CLEC4A/LILRB4	8
BP	GO:2000516	positive regulation of CD4-positive, alpha-beta T cell activation	6/256	0.000125393	IFNG/HLA-DRA/NCKAP1L/IL12RB1/CD86/SASH3	6
BP	GO:0042116	macrophage activation	9/256	0.000135036	TLR6/IFNG/CD74/PTPRC/AIF1/ITGB2/C1QA/CD84/CST7	9
BP	GO:0050730	regulation of peptidyl-tyrosine phosphorylation	14/256	0.000135178	IFNG/NOD2/CD74/PTPRC/FCGR1A/PTPN6/CD3E/ITGB2/CLEC7A/NCF1/CD4/HCLS1/CCL5/LILRB4	14
BP	GO:0002886	regulation of myeloid leukocyte mediated immunity	7/256	0.000137406	SPI1/RAC2/ITGB2/BTK/CCR2/CD84/UNC13D	7
BP	GO:0072538	T-helper 17 type immune response	6/256	0.000143623	BATF/IRF4/CLEC7A/LY9/SLAMF6/IL12RB1	6
BP	GO:0030890	positive regulation of B cell proliferation	6/256	0.000189694	CD74/PTPRC/CD38/NCKAP1L/TNFSF13B/SASH3	6
BP	GO:0032735	positive regulation of interleukin-12 production	6/256	0.000189694	IFNG/NOD2/SCIMP/CLEC7A/LAPTM5/IL16	6
BP	GO:0050691	regulation of defense response to virus by host	6/256	0.000189694	LILRB1/PTPN22/APOBEC3G/IL12RB1/AIM2/MICB	6
BP	GO:0050921	positive regulation of chemotaxis	10/256	0.000202265	SPI1/RAC2/CD74/CCR4/AIF1/GPSM3/CCR2/IL16/NCKAP1L/CCL5	10
BP	GO:0033627	cell adhesion mediated by integrin	8/256	0.000202527	FERMT3/PTPN6/LPXN/CD3E/ITGB2/ITGAL/NCKAP1L/CCL5	8
BP	GO:0032613	interleukin-10 production	7/256	0.00020644	NOD2/LILRB1/IRF4/CLEC7A/LILRB4/TIGIT/SASH3	7
BP	GO:0032653	regulation of interleukin-10 production	7/256	0.00020644	NOD2/LILRB1/IRF4/CLEC7A/LILRB4/TIGIT/SASH3	7
BP	GO:0002407	dendritic cell chemotaxis	5/256	0.000208672	SPI1/CCR2/CCL5/CCR5/TRPM2	5
BP	GO:0002710	negative regulation of T cell mediated immunity	5/256	0.00025233	NOD2/LILRB1/PTPRC/NCKAP1L/LILRB4	5
BP	GO:0009615	response to virus	17/256	0.000253515	CXCL9/IFNG/LILRB1/WDFY4/POU2F2/PTPN22/SAMHD1/PTPRC/ZBP1/APOBEC3G/IL12RB1/APOBEC3H/AIM2/CCL5/UNC13D/TLR8/MICB	17
BP	GO:0033004	negative regulation of mast cell activation	4/256	0.000264919	CD300LF/MILR1/PTPN6/CD84	4
BP	GO:0043301	negative regulation of leukocyte degranulation	4/256	0.000264919	SPI1/CCR2/NCKAP1L/CD84	4
BP	GO:0002221	pattern recognition receptor signaling pathway	11/256	0.000266457	TLR6/NOD2/PTPN22/CD300LF/GFI1/CTSS/SCIMP/BTK/IRF4/CLEC7A/TLR8	11
BP	GO:0006959	humoral immune response	15/256	0.000275231	CXCL9/IFNG/NOD2/POU2F2/PTPRC/LTA/PDCD1/PTPN6/TRBC2/SH2D1A/C1QA/CCR2/TRBC1/C1QC/C1QB	15
BP	GO:0002761	regulation of myeloid leukocyte differentiation	9/256	0.000278904	IFNG/LILRB1/CD74/EVI2B/GPR55/CD4/HCLS1/C1QC/LILRB4	9
BP	GO:0002573	myeloid leukocyte differentiation	12/256	0.000279987	SPI1/IFNG/LILRB1/CD74/EVI2B/BATF/GPR55/IRF4/CD4/HCLS1/C1QC/LILRB4	12
BP	GO:0032703	negative regulation of interleukin-2 production	5/256	0.000294022	NOD2/LAG3/PTPRC/LAPTM5/LILRB4	5
BP	GO:0072539	T-helper 17 cell differentiation	5/256	0.000294022	BATF/IRF4/LY9/SLAMF6/IL12RB1	5
BP	GO:0072678	T cell migration	7/256	0.000296597	CD200R1/SPN/AIF1/CCR2/MYO1G/ITGAL/CCL5	7
BP	GO:0042130	negative regulation of T cell proliferation	7/256	0.000325675	LILRB1/LILRB2/PTPN6/SPN/CRTAM/LILRB4/CD86	7
BP	GO:0030101	natural killer cell activation	8/256	0.000337926	IL21R/PTPN22/PTPRC/CD2/IL2RB/CORO1A/TOX/UNC13D	8
BP	GO:0097028	dendritic cell differentiation	6/256	0.000341207	SPI1/LILRB1/LILRB2/BATF/IRF4/TRPM2	6
BP	GO:0002468	dendritic cell antigen processing and presentation	4/256	0.000341207	NOD2/CD74/CLEC4A/HLA-DRA	4
BP	GO:0002517	T cell tolerance induction	4/256	0.000341207	ICOS/LILRB2/CD3E/LILRB4	4
BP	GO:0071639	positive regulation of monocyte chemotactic protein-1 production	4/256	0.000341207	MCOLN2/NOD2/CLEC7A/CD84	4
BP	GO:0001773	myeloid dendritic cell activation	5/256	0.000341589	SPI1/DOCK2/BATF/CD2/IRF4	5
BP	GO:0002455	humoral immune response mediated by circulating immunoglobulin	9/256	0.000347614	NOD2/PTPRC/LTA/PTPN6/TRBC2/C1QA/TRBC1/C1QC/C1QB	9
BP	GO:0051209	release of sequestered calcium ion into cytosol	9/256	0.000347614	MCOLN2/CXCL9/PTPRC/PTPN6/LCK/FASLG/CORO1A/CCR5/TRPM2	9
BP	GO:0002690	positive regulation of leukocyte chemotaxis	8/256	0.000355034	SPI1/RAC2/CD74/AIF1/GPSM3/CCR2/NCKAP1L/CCL5	8
BP	GO:0051283	negative regulation of sequestering of calcium ion	9/256	0.000368363	MCOLN2/CXCL9/PTPRC/PTPN6/LCK/FASLG/CORO1A/CCR5/TRPM2	9
BP	GO:0033628	regulation of cell adhesion mediated by integrin	6/256	0.000374864	FERMT3/PTPN6/LPXN/CD3E/NCKAP1L/CCL5	6
BP	GO:0032722	positive regulation of chemokine production	7/256	0.000377458	MCOLN2/IFNG/NOD2/CD74/AIF1/CLEC7A/CD84	7
BP	GO:0051607	defense response to virus	14/256	0.000380777	CXCL9/IFNG/LILRB1/PTPN22/SAMHD1/PTPRC/ZBP1/APOBEC3G/IL12RB1/APOBEC3H/AIM2/UNC13D/TLR8/MICB	14
BP	GO:0140546	defense response to symbiont	14/256	0.000393092	CXCL9/IFNG/LILRB1/PTPN22/SAMHD1/PTPRC/ZBP1/APOBEC3G/IL12RB1/APOBEC3H/AIM2/UNC13D/TLR8/MICB	14
BP	GO:0038094	Fc-gamma receptor signaling pathway	5/256	0.000393092	PTPRC/VAV1/HCK/MYO1G/FCER1G	5
BP	GO:0051282	regulation of sequestering of calcium ion	9/256	0.000410141	MCOLN2/CXCL9/PTPRC/PTPN6/LCK/FASLG/CORO1A/CCR5/TRPM2	9
BP	GO:0050862	positive regulation of T cell receptor signaling pathway	4/256	0.000431715	TRAT1/TESPA1/LCK/CD226	4
BP	GO:0032642	regulation of chemokine production	8/256	0.000431715	MCOLN2/IFNG/NOD2/CD74/AIF1/CLEC7A/CD84/LILRB4	8
BP	GO:0002230	positive regulation of defense response to virus by host	5/256	0.000455834	LILRB1/PTPN22/APOBEC3G/IL12RB1/AIM2	5
BP	GO:0045577	regulation of B cell differentiation	5/256	0.000455834	PTPN6/BTK/CD27/NCKAP1L/IKZF3	5
BP	GO:0043303	mast cell degranulation	6/256	0.000458518	RAC2/MILR1/LAT2/BTK/CD84/UNC13D	6
BP	GO:0032602	chemokine production	8/256	0.000458518	MCOLN2/IFNG/NOD2/CD74/AIF1/CLEC7A/CD84/LILRB4	8
BP	GO:0050731	positive regulation of peptidyl-tyrosine phosphorylation	11/256	0.000483316	IFNG/NOD2/CD74/PTPRC/FCGR1A/CD3E/CLEC7A/NCF1/CD4/HCLS1/CCL5	11
BP	GO:0050920	regulation of chemotaxis	12/256	0.000497155	SPI1/RAC2/NOD2/CD74/GPR18/CCR4/AIF1/GPSM3/CCR2/IL16/NCKAP1L/CCL5	12
BP	GO:0051208	sequestering of calcium ion	9/256	0.000510236	MCOLN2/CXCL9/PTPRC/PTPN6/LCK/FASLG/CORO1A/CCR5/TRPM2	9
BP	GO:0042100	B cell proliferation	8/256	0.000522177	CD74/PTPRC/CD38/BTK/NCKAP1L/IKZF3/TNFSF13B/SASH3	8
BP	GO:0051482	positive regulation of cytosolic calcium ion concentration involved in phospholipase C-activating G protein-coupled signaling pathway	5/256	0.000522177	GPR65/P2RY10/GPR18/GPR174/GPR55	5
BP	GO:0002534	cytokine production involved in inflammatory response	7/256	0.0005541	GBP5/TLR6/NOD2/GPSM3/CLEC7A/LILRB4/CD6	7
BP	GO:0050848	regulation of calcium-mediated signaling	7/256	0.0005541	PLEK/TRAT1/CD3E/TBC1D10C/CLEC7A/CD4/SLA2	7
BP	GO:0070227	lymphocyte apoptotic process	7/256	0.0005541	CD74/PDCD1/BTK/CD3G/CD27/FASLG/CCL5	7
BP	GO:1900015	regulation of cytokine production involved in inflammatory response	7/256	0.0005541	GBP5/TLR6/NOD2/GPSM3/CLEC7A/LILRB4/CD6	7
BP	GO:0002448	mast cell mediated immunity	6/256	0.000554523	RAC2/MILR1/LAT2/BTK/CD84/UNC13D	6
BP	GO:0006816	calcium ion transport	17/256	0.000579775	MCOLN2/CXCL9/CD33/LILRB1/LILRB2/PTPRC/PTPN6/LCK/PRKCB/CD4/IL16/FASLG/CORO1A/CD84/CCL5/CCR5/TRPM2	17
BP	GO:0045589	regulation of regulatory T cell differentiation	5/256	0.000595144	IFNG/LAG3/LILRB2/HLA-DRA/LILRB4	5
BP	GO:0002923	regulation of humoral immune response mediated by circulating immunoglobulin	4/256	0.000670578	NOD2/PTPRC/LTA/PTPN6	4
BP	GO:0002823	negative regulation of adaptive immune response based on somatic recombination of immune receptors built from immunoglobulin superfamily domains	6/256	0.000679029	NOD2/LILRB1/PTPRC/PTPN6/NCKAP1L/LILRB4	6
BP	GO:0035025	positive regulation of Rho protein signal transduction	5/256	0.000683563	GPR65/P2RY10/GPR18/GPR174/GPR55	5
BP	GO:0008154	actin polymerization or depolymerization	11/256	0.000697938	WAS/PSTPIP1/CARMIL2/WIPF1/PLEK/HCK/AIF1/NCKAP1L/HCLS1/SH3BP1/CORO1A	11
BP	GO:0001959	regulation of cytokine-mediated signaling pathway	10/256	0.000712873	CD74/SAMHD1/PTPRC/CD300LF/GFI1/PTPN6/ZBP1/LAPTM5/CASP1/CCL5	10
BP	GO:0032695	negative regulation of interleukin-12 production	4/256	0.000824731	NOD2/LILRB1/TIGIT/TLR8	4
BP	GO:0071800	podosome assembly	4/256	0.000824731	ASB2/BIN2/HCK/LCP1	4
BP	GO:0001961	positive regulation of cytokine-mediated signaling pathway	6/256	0.000902265	CD74/CD300LF/GFI1/ZBP1/LAPTM5/CASP1	6
BP	GO:0070228	regulation of lymphocyte apoptotic process	6/256	0.000902265	CD74/PDCD1/BTK/CD3G/CD27/CCL5	6
BP	GO:0002643	regulation of tolerance induction	4/256	0.00100142	LILRB2/PDCD1/CD3E/LILRB4	4
BP	GO:0045591	positive regulation of regulatory T cell differentiation	4/256	0.00100142	IFNG/LILRB2/HLA-DRA/LILRB4	4
BP	GO:0002687	positive regulation of leukocyte migration	9/256	0.00100142	SPI1/RAC2/CD74/SPN/AIF1/GPSM3/CCR2/NCKAP1L/CCL5	9
BP	GO:0042092	type 2 immune response	5/256	0.00100142	NOD2/CD74/BATF/CCR2/CD86	5
BP	GO:0045637	regulation of myeloid cell differentiation	11/256	0.00100142	SPI1/IFNG/LILRB1/CD74/EVI2B/GPR55/CD4/NCKAP1L/HCLS1/C1QC/LILRB4	11
BP	GO:0031532	actin cytoskeleton reorganization	8/256	0.00101526	ASB2/GPR65/CARMIL2/PLEK/HCK/PARVG/HCLS1/TRPM2	8
BP	GO:0002820	negative regulation of adaptive immune response	6/256	0.00107208	NOD2/LILRB1/PTPRC/PTPN6/NCKAP1L/LILRB4	6
BP	GO:0007015	actin filament organization	17/256	0.00112281	WAS/RAC2/PSTPIP1/RHOH/GPR65/CARMIL2/WIPF1/PLEK/MYO1F/HCK/AIF1/LCP1/MYO1G/NCKAP1L/HCLS1/SH3BP1/CORO1A	17
BP	GO:0033630	positive regulation of cell adhesion mediated by integrin	4/256	0.00119826	PTPN6/CD3E/NCKAP1L/CCL5	4
BP	GO:0071605	monocyte chemotactic protein-1 production	4/256	0.00119826	MCOLN2/NOD2/CLEC7A/CD84	4
BP	GO:0071637	regulation of monocyte chemotactic protein-1 production	4/256	0.00119826	MCOLN2/NOD2/CLEC7A/CD84	4
BP	GO:0060759	regulation of response to cytokine stimulus	10/256	0.00120656	CD74/SAMHD1/PTPRC/CD300LF/GFI1/PTPN6/ZBP1/LAPTM5/CASP1/CCL5	10
BP	GO:0007249	I-kappaB kinase/NF-kappaB signaling	13/256	0.0012087	TLR6/RHOH/NOD2/CD74/TIFAB/BTK/CLEC7A/PRKCB/CASP1/CD4/FASLG/LILRB4/TLR8	13
BP	GO:0030865	cortical cytoskeleton organization	6/256	0.00126114	RAC2/RHOH/PLEK/FMNL1/LCP1/NCKAP1L	6
BP	GO:0034113	heterotypic cell-cell adhesion	6/256	0.00126114	LILRB2/CD200R1/PTPRC/CD2/ITGB2/LCK	6
BP	GO:0002712	regulation of B cell mediated immunity	6/256	0.00136845	NOD2/PTPRC/LTA/PTPN6/BTK/CD226	6
BP	GO:0002889	regulation of immunoglobulin mediated immune response	6/256	0.00136845	NOD2/PTPRC/LTA/PTPN6/BTK/CD226	6
BP	GO:0031663	lipopolysaccharide-mediated signaling pathway	6/256	0.00136845	SPI1/PTPN22/SCIMP/HCK/CCL5/CD6	6
BP	GO:0001914	regulation of T cell mediated cytotoxicity	5/256	0.00139843	LILRB1/PTPRC/HLA-DRA/NCKAP1L/IL12RB1	5
BP	GO:0046633	alpha-beta T cell proliferation	5/256	0.00139843	DOCK2/PTPN22/PTPRC/CD3E/CCR2	5
BP	GO:0070269	pyroptosis	4/256	0.00140706	GZMA/ZBP1/CASP1/AIM2	4
BP	GO:0001776	leukocyte homeostasis	7/256	0.00147228	SIT1/CD74/GPR174/CCR2/NCKAP1L/CORO1A/TNFSF13B	7
BP	GO:0070098	chemokine-mediated signaling pathway	7/256	0.00147228	CXCL9/CCR4/CXCR3/CXCR6/CCR2/CCL5/CCR5	7
BP	GO:0002714	positive regulation of B cell mediated immunity	5/256	0.00154482	NOD2/PTPRC/LTA/BTK/CD226	5
BP	GO:0002891	positive regulation of immunoglobulin mediated immune response	5/256	0.00154482	NOD2/PTPRC/LTA/BTK/CD226	5
BP	GO:0032733	positive regulation of interleukin-10 production	5/256	0.00154482	NOD2/IRF4/CLEC7A/TIGIT/SASH3	5
BP	GO:0072676	lymphocyte migration	8/256	0.00154482	CD200R1/SPN/AIF1/CRTAM/CCR2/MYO1G/ITGAL/CCL5	8
BP	GO:0008360	regulation of cell shape	9/256	0.00156662	RAC2/RHOH/FGD2/LST1/HCK/FMNL1/ITGB2/FGD3/CORO1A	9
BP	GO:0009620	response to fungus	6/256	0.00157642	SPI1/SCIMP/ZBP1/BTK/CLEC4A/CLEC7A	6
BP	GO:0060760	positive regulation of response to cytokine stimulus	6/256	0.00157642	CD74/CD300LF/GFI1/ZBP1/LAPTM5/CASP1	6
BP	GO:0046641	positive regulation of alpha-beta T cell proliferation	4/256	0.00163782	PTPN22/PTPRC/CD3E/CCR2	4
BP	GO:0002260	lymphocyte homeostasis	6/256	0.00170407	SIT1/CD74/GPR174/NCKAP1L/CORO1A/TNFSF13B	6
BP	GO:0032689	negative regulation of interferon-gamma production	5/256	0.00170407	CD96/NOD2/LILRB1/LAPTM5/LILRB4	5
BP	GO:0097553	calcium ion transmembrane import into cytosol	9/256	0.00178375	MCOLN2/CXCL9/PTPRC/PTPN6/LCK/FASLG/CORO1A/CCR5/TRPM2	9
BP	GO:0001915	negative regulation of T cell mediated cytotoxicity	3/256	0.00185795	LILRB1/PTPRC/NCKAP1L	3
BP	GO:0002291	T cell activation via T cell receptor contact with antigen bound to MHC molecule on antigen presenting cell	3/256	0.00185795	LILRB1/ITGAL/HLA-DMB	3
BP	GO:0002755	MyD88-dependent toll-like receptor signaling pathway	4/256	0.00191224	TLR6/CD300LF/BTK/TLR8	4
BP	GO:2000404	regulation of T cell migration	5/256	0.00209856	CD200R1/SPN/AIF1/CCR2/CCL5	5
BP	GO:0030099	myeloid cell differentiation	15/256	0.00212342	SPI1/IFNG/LILRB1/CD74/EVI2B/BATF/PTPN6/GPR55/IRF4/CD4/NCKAP1L/HCLS1/C1QC/LILRB4/IKZF1	15
BP	GO:0031348	negative regulation of defense response	12/256	0.0021347	CD96/NOD2/LILRB1/SAMHD1/CD200R1/PTPRC/HCK/TNFAIP8L2/SIGLEC10/MICB/AOAH/CST7	12
BP	GO:1903306	negative regulation of regulated secretory pathway	4/256	0.00222765	SPI1/CCR2/NCKAP1L/CD84	4
BP	GO:0032715	negative regulation of interleukin-6 production	6/256	0.00229073	PTPN22/CD200R1/PTPN6/NCKAP1L/CD84/LILRB4	6
BP	GO:0032620	interleukin-17 production	5/256	0.00229073	IFNG/NOD2/NCKAP1L/LY9/SLAMF6	5
BP	GO:0032660	regulation of interleukin-17 production	5/256	0.00229073	IFNG/NOD2/NCKAP1L/LY9/SLAMF6	5
BP	GO:1902622	regulation of neutrophil migration	5/256	0.00229073	RAC2/RHOH/NOD2/CD74/NCKAP1L	5
BP	GO:1990868	response to chemokine	7/256	0.00234207	CXCL9/CCR4/CXCR3/CXCR6/CCR2/CCL5/CCR5	7
BP	GO:1990869	cellular response to chemokine	7/256	0.00234207	CXCL9/CCR4/CXCR3/CXCR6/CCR2/CCL5/CCR5	7
BP	GO:0002732	positive regulation of dendritic cell cytokine production	3/256	0.00243459	NOD2/SCIMP/CLEC7A	3
BP	GO:0033632	regulation of cell-cell adhesion mediated by integrin	3/256	0.00243459	FERMT3/CD3E/CCL5	3
BP	GO:0098883	synapse pruning	3/256	0.00243459	C1QA/C1QC/C1QB	3
BP	GO:0002433	immune response-regulating cell surface receptor signaling pathway involved in phagocytosis	4/256	0.00252869	PTPRC/VAV1/HCK/MYO1G	4
BP	GO:0038096	Fc-gamma receptor signaling pathway involved in phagocytosis	4/256	0.00252869	PTPRC/VAV1/HCK/MYO1G	4
BP	GO:0043410	positive regulation of MAPK cascade	17/256	0.00272395	SPI1/TLR6/NOD2/FGD2/CD74/PTPN22/PTPRC/MAP4K1/SCIMP/GPR55/CLEC7A/CD27/NCF1/LAPTM5/CD4/PIK3R5/CCL5	17
BP	GO:0036230	granulocyte activation	5/256	0.00274634	SPI1/ITGB2/CCR2/FCER1G/CCL5	5
BP	GO:0045123	cellular extravasation	6/256	0.00302003	SELPLG/SPN/CCR2/JAML/ITGAL/SELL	6
BP	GO:1902106	negative regulation of leukocyte differentiation	7/256	0.00310377	LILRB1/CD74/LAG3/GPR55/C1QC/LILRB4/RUNX3	7
BP	GO:0002645	positive regulation of tolerance induction	3/256	0.0031382	LILRB2/CD3E/LILRB4	3
BP	GO:0002887	negative regulation of myeloid leukocyte mediated immunity	3/256	0.0031382	SPI1/CCR2/CD84	3
BP	GO:0060907	positive regulation of macrophage cytokine production	3/256	0.0031382	LILRB1/CD74/LAPTM5	3
BP	GO:0048872	homeostasis of number of cells	12/256	0.00319516	SPI1/SIT1/CD74/CCR4/GPR174/CCR2/NCKAP1L/HCLS1/CORO1A/IKZF1/TNFSF13B/SASH3	12
BP	GO:0050688	regulation of defense response to virus	6/256	0.00319905	LILRB1/PTPN22/APOBEC3G/IL12RB1/AIM2/MICB	6
BP	GO:0030225	macrophage differentiation	5/256	0.0032704	SPI1/IFNG/CD4/HCLS1/C1QC	5
BP	GO:0002437	inflammatory response to antigenic stimulus	6/256	0.00342044	NOD2/FCGR1A/LTA/HCK/BTK/CD6	6
BP	GO:0060402	calcium ion transport into cytosol	9/256	0.003545	MCOLN2/CXCL9/PTPRC/PTPN6/LCK/FASLG/CORO1A/CCR5/TRPM2	9
BP	GO:0001913	T cell mediated cytotoxicity	5/256	0.00356621	LILRB1/PTPRC/HLA-DRA/NCKAP1L/IL12RB1	5
BP	GO:0034121	regulation of toll-like receptor signaling pathway	6/256	0.00364373	TLR6/NOD2/PTPN22/CD300LF/GFI1/IRF4	6
BP	GO:1903707	negative regulation of hemopoiesis	7/256	0.00380231	LILRB1/CD74/LAG3/GPR55/C1QC/LILRB4/RUNX3	7
BP	GO:0071622	regulation of granulocyte chemotaxis	5/256	0.00388057	RAC2/NOD2/CD74/NCKAP1L/CCL5	5
BP	GO:0002664	regulation of T cell tolerance induction	3/256	0.00390647	LILRB2/CD3E/LILRB4	3
BP	GO:0032621	interleukin-18 production	3/256	0.00390647	GBP5/NOD2/CD84	3
BP	GO:0032661	regulation of interleukin-18 production	3/256	0.00390647	GBP5/NOD2/CD84	3
BP	GO:0042492	gamma-delta T cell differentiation	3/256	0.00390647	PTPRC/GPR18/NCKAP1L	3
BP	GO:0007229	integrin-mediated signaling pathway	7/256	0.00396142	FYB1/FERMT3/PLEK/VAV1/HCK/ITGB2/ITGAL	7
BP	GO:1903305	regulation of regulated secretory pathway	8/256	0.0040646	SPI1/RAC2/ITGB2/CCR2/PRKCB/NCKAP1L/CD84/UNC13D	8
BP	GO:0007202	activation of phospholipase C activity	4/256	0.00418619	GPR55/PLCB2/CD86/ITK	4
BP	GO:0032418	lysosome localization	6/256	0.00435596	RAC2/MILR1/LAT2/BTK/CD84/UNC13D	6
BP	GO:1990849	vacuolar localization	6/256	0.00435596	RAC2/MILR1/LAT2/BTK/CD84/UNC13D	6
BP	GO:0030183	B cell differentiation	8/256	0.00441729	SPI1/PTPRC/PTPN6/BTK/CD27/NCKAP1L/IKZF3/TNFSF13B	8
BP	GO:2000406	positive regulation of T cell migration	4/256	0.00470829	SPN/AIF1/CCR2/CCL5	4
BP	GO:0045579	positive regulation of B cell differentiation	3/256	0.00480107	BTK/CD27/NCKAP1L	3
BP	GO:0098760	response to interleukin-7	3/256	0.00480107	BTK/LSP1/IL2RG	3
BP	GO:0098761	cellular response to interleukin-7	3/256	0.00480107	BTK/LSP1/IL2RG	3
BP	GO:0050729	positive regulation of inflammatory response	8/256	0.00500217	IFNG/LTA/ZBP1/GPSM3/BTK/CCR2/CASP1/IL16	8
BP	GO:0007163	establishment or maintenance of cell polarity	10/256	0.00510026	RAC2/RHOH/DOCK2/CARMIL2/SPN/CRTAM/PARVG/CD3G/NCKAP1L/SH3BP1	10
BP	GO:0051651	maintenance of location in cell	10/256	0.00510026	MCOLN2/CXCL9/PTPRC/PTPN6/LCK/CD4/FASLG/CORO1A/CCR5/TRPM2	10
BP	GO:0002828	regulation of type 2 immune response	4/256	0.00523241	NOD2/CD74/CCR2/CD86	4
BP	GO:0002763	positive regulation of myeloid leukocyte differentiation	5/256	0.00523241	IFNG/CD74/EVI2B/CD4/HCLS1	5
BP	GO:0010518	positive regulation of phospholipase activity	5/256	0.00523241	GPR55/CCL5/PLCB2/CD86/ITK	5
BP	GO:0061756	leukocyte adhesion to vascular endothelial cell	5/256	0.00566867	SELPLG/SPN/ITGB2/CCR2/SELL	5
BP	GO:0007265	Ras protein signal transduction	13/256	0.00574509	WAS/RAC2/RHOH/GPR65/P2RY10/GPR18/AIF1/GPR174/GPR55/SH3BP1/GRAP2/DOK2/CYTH4	13
BP	GO:0002730	regulation of dendritic cell cytokine production	3/256	0.00576563	NOD2/SCIMP/CLEC7A	3
BP	GO:0030852	regulation of granulocyte differentiation	3/256	0.00576563	EVI2B/HCLS1/C1QC	3
BP	GO:0045346	regulation of MHC class II biosynthetic process	3/256	0.00576563	SPI1/IFNG/CIITA	3
BP	GO:0050901	leukocyte tethering or rolling	4/256	0.00576563	SELPLG/SPN/CCR2/SELL	4
BP	GO:0090022	regulation of neutrophil chemotaxis	4/256	0.00576563	RAC2/NOD2/CD74/NCKAP1L	4
BP	GO:0033006	regulation of mast cell activation involved in immune response	4/256	0.00643451	RAC2/PTPN6/CD84/UNC13D	4
BP	GO:0050850	positive regulation of calcium-mediated signaling	4/256	0.00643451	TRAT1/CD3E/CLEC7A/CD4	4
BP	GO:1901216	positive regulation of neuron death	6/256	0.00686883	TLR6/IFNG/ITGB2/C1QA/FASLG/TRPM2	6
BP	GO:0060401	cytosolic calcium ion transport	9/256	0.00686883	MCOLN2/CXCL9/PTPRC/PTPN6/LCK/FASLG/CORO1A/CCR5/TRPM2	9
BP	GO:0002371	dendritic cell cytokine production	3/256	0.00691612	NOD2/SCIMP/CLEC7A	3
BP	GO:0045342	MHC class II biosynthetic process	3/256	0.00691612	SPI1/IFNG/CIITA	3
BP	GO:0002218	activation of innate immune response	5/256	0.00696917	ZBP1/HCK/CLEC7A/AIM2/PYHIN1	5
BP	GO:0045920	negative regulation of exocytosis	4/256	0.00708708	SPI1/CCR2/NCKAP1L/CD84	4
BP	GO:0031334	positive regulation of protein-containing complex assembly	9/256	0.00783367	GBP5/TLR6/IFNG/CARMIL2/PLEK/HCK/LCP1/CLEC7A/NCKAP1L	9
BP	GO:0010922	positive regulation of phosphatase activity	4/256	0.00783367	IFNG/CD33/PTPRC/PLEK	4
BP	GO:0030851	granulocyte differentiation	4/256	0.00783367	SPI1/EVI2B/HCLS1/C1QC	4
BP	GO:0035306	positive regulation of dephosphorylation	5/256	0.00800745	IFNG/CD33/LILRB2/PTPRC/PLEK	5
BP	GO:0002544	chronic inflammatory response	3/256	0.0080795	LTA/CCL5/UNC13D	3
BP	GO:0002830	positive regulation of type 2 immune response	3/256	0.0080795	NOD2/CD74/CD86	3
BP	GO:0010934	macrophage cytokine production	3/256	0.0080795	LILRB1/CD74/LAPTM5	3
BP	GO:0010935	regulation of macrophage cytokine production	3/256	0.0080795	LILRB1/CD74/LAPTM5	3
BP	GO:0033194	response to hydroperoxide	3/256	0.0080795	CD38/AIF1/TRPM2	3
BP	GO:0033631	cell-cell adhesion mediated by integrin	3/256	0.0080795	FERMT3/CD3E/CCL5	3
BP	GO:0008064	regulation of actin polymerization or depolymerization	8/256	0.0080795	WAS/CARMIL2/PLEK/HCK/NCKAP1L/HCLS1/SH3BP1/CORO1A	8
BP	GO:0030832	regulation of actin filament length	8/256	0.00839054	WAS/CARMIL2/PLEK/HCK/NCKAP1L/HCLS1/SH3BP1/CORO1A	8
BP	GO:0032757	positive regulation of interleukin-8 production	5/256	0.00840064	NOD2/CD74/CD2/CLEC7A/TLR8	5
BP	GO:0043030	regulation of macrophage activation	5/256	0.00840064	TLR6/CD74/PTPRC/CD84/CST7	5
BP	GO:0046579	positive regulation of Ras protein signal transduction	5/256	0.00840064	GPR65/P2RY10/GPR18/GPR174/GPR55	5
BP	GO:0046640	regulation of alpha-beta T cell proliferation	4/256	0.00841688	PTPN22/PTPRC/CD3E/CCR2	4
BP	GO:2000403	positive regulation of lymphocyte migration	4/256	0.00841688	SPN/AIF1/CCR2/CCL5	4
BP	GO:2000401	regulation of lymphocyte migration	5/256	0.00896431	CD200R1/SPN/AIF1/CCR2/CCL5	5
BP	GO:0045622	regulation of T-helper cell differentiation	4/256	0.00926598	IRF4/HLA-DRA/IL12RB1/CD86	4
BP	GO:0060263	regulation of respiratory burst	3/256	0.00937114	RAC2/CLEC7A/NCF1	3
BP	GO:0150079	negative regulation of neuroinflammatory response	3/256	0.00937114	CD200R1/PTPRC/CST7	3
BP	GO:0009595	detection of biotic stimulus	4/256	0.0101252	TLR6/NOD2/CRTAM/CLEC7A	4
BP	GO:0043029	T cell homeostasis	4/256	0.0101252	SIT1/GPR174/NCKAP1L/CORO1A	4
BP	GO:0017157	regulation of exocytosis	9/256	0.0105149	SPI1/RAC2/IFNG/ITGB2/CCR2/PRKCB/NCKAP1L/CD84/UNC13D	9
BP	GO:0010517	regulation of phospholipase activity	5/256	0.0108337	GPR55/CCL5/PLCB2/CD86/ITK	5
BP	GO:0071677	positive regulation of mononuclear cell migration	5/256	0.0108337	SPI1/SPN/AIF1/CCR2/CCL5	5
BP	GO:0002283	neutrophil activation involved in immune response	3/256	0.0108479	SPI1/ITGB2/FCER1G	3
BP	GO:0002888	positive regulation of myeloid leukocyte mediated immunity	3/256	0.0108479	SPI1/ITGB2/BTK	3
BP	GO:0010863	positive regulation of phospholipase C activity	4/256	0.0109612	GPR55/PLCB2/CD86/ITK	4
BP	GO:0030866	cortical actin cytoskeleton organization	4/256	0.0109612	PLEK/FMNL1/LCP1/NCKAP1L	4
BP	GO:0030041	actin filament polymerization	8/256	0.0117976	WAS/PSTPIP1/CARMIL2/HCK/AIF1/NCKAP1L/HCLS1/CORO1A	8
BP	GO:0034122	negative regulation of toll-like receptor signaling pathway	4/256	0.0119139	TLR6/NOD2/CD300LF/IRF4	4
BP	GO:0042119	neutrophil activation	4/256	0.0119139	SPI1/ITGB2/FCER1G/CCL5	4
BP	GO:0045429	positive regulation of nitric oxide biosynthetic process	4/256	0.0119139	TLR6/IFNG/AIF1/CLEC7A	4
BP	GO:0060193	positive regulation of lipase activity	5/256	0.0121218	GPR55/CCL5/PLCB2/CD86/ITK	5
BP	GO:0045639	positive regulation of myeloid cell differentiation	6/256	0.0121459	IFNG/CD74/EVI2B/CD4/NCKAP1L/HCLS1	6
BP	GO:0032102	negative regulation of response to external stimulus	14/256	0.0121574	CD96/NOD2/LILRB1/SAMHD1/CD200R1/PTPRC/GPR18/HCK/AIF1/TNFAIP8L2/SIGLEC10/MICB/AOAH/CST7	14
BP	GO:0043011	myeloid dendritic cell differentiation	3/256	0.0122938	SPI1/BATF/IRF4	3
BP	GO:0090026	positive regulation of monocyte chemotaxis	3/256	0.0122938	AIF1/CCR2/CCL5	3
BP	GO:0098543	detection of other organism	3/256	0.0122938	TLR6/NOD2/CLEC7A	3
BP	GO:0051924	regulation of calcium ion transport	10/256	0.0122938	CXCL9/CD33/LILRB1/LILRB2/PTPN6/CD4/IL16/CORO1A/CD84/CCL5	10
BP	GO:0002347	response to tumor cell	4/256	0.012753	SPI1/CRTAM/LAPTM5/CD226	4
BP	GO:1900274	regulation of phospholipase C activity	4/256	0.012753	GPR55/PLCB2/CD86/ITK	4
BP	GO:2000249	regulation of actin cytoskeleton reorganization	4/256	0.012753	CARMIL2/HCK/HCLS1/TRPM2	4
BP	GO:0043122	regulation of I-kappaB kinase/NF-kappaB signaling	10/256	0.0132813	TLR6/RHOH/NOD2/CD74/CLEC7A/PRKCB/CASP1/CD4/FASLG/LILRB4	10
BP	GO:0051057	positive regulation of small GTPase mediated signal transduction	5/256	0.013449	GPR65/P2RY10/GPR18/GPR174/GPR55	5
BP	GO:0016601	Rac protein signal transduction	4/256	0.0137668	RAC2/RHOH/AIF1/SH3BP1	4
BP	GO:0042554	superoxide anion generation	4/256	0.0137668	NCF1B/ITGB2/CLEC7A/NCF1	4
BP	GO:1904407	positive regulation of nitric oxide metabolic process	4/256	0.0137668	TLR6/IFNG/AIF1/CLEC7A	4
BP	GO:0050849	negative regulation of calcium-mediated signaling	3/256	0.0138637	PLEK/TBC1D10C/SLA2	3
BP	GO:0061760	antifungal innate immune response	3/256	0.0138637	SPI1/CLEC4A/CLEC7A	3
BP	GO:0150146	cell junction disassembly	3/256	0.0138637	C1QA/C1QC/C1QB	3
BP	GO:0007200	phospholipase C-activating G protein-coupled receptor signaling pathway	6/256	0.0150004	GPR65/P2RY10/GPR18/GPR174/GPR55/PLCB2	6
BP	GO:0045860	positive regulation of protein kinase activity	13/256	0.0157287	TLR6/IFNG/NOD2/FGD2/LCP2/PTPRC/FCGR1A/NCF1/CD4/NCKAP1L/PIK3R5/CCL5/CD86	13
BP	GO:0006925	inflammatory cell apoptotic process	3/256	0.0157287	NOD2/FASLG/CCR5	3
BP	GO:0044546	NLRP3 inflammasome complex assembly	3/256	0.0157287	GBP5/TLR6/AIM2	3
BP	GO:0061081	positive regulation of myeloid leukocyte cytokine production involved in immune response	3/256	0.0157287	LILRB1/CD74/LAPTM5	3
BP	GO:0038061	NIK/NF-kappaB signaling	7/256	0.0158729	SPI1/TLR6/NOD2/PTPN22/CD27/LAPTM5/CD86	7
BP	GO:0002861	regulation of inflammatory response to antigenic stimulus	4/256	0.0158729	NOD2/LTA/HCK/BTK	4
BP	GO:0002920	regulation of humoral immune response	4/256	0.0158729	NOD2/PTPRC/LTA/PTPN6	4
BP	GO:0042088	T-helper 1 type immune response	4/256	0.0158729	IL18BP/SPN/CCR2/IL12RB1	4
BP	GO:0062207	regulation of pattern recognition receptor signaling pathway	6/256	0.0161872	TLR6/NOD2/PTPN22/CD300LF/GFI1/IRF4	6
BP	GO:0032956	regulation of actin cytoskeleton organization	12/256	0.0163556	WAS/RAC2/RHOH/GPR65/CARMIL2/PLEK/HCK/NCKAP1L/HCLS1/SH3BP1/CORO1A/TRPM2	12
BP	GO:0045581	negative regulation of T cell differentiation	4/256	0.0170966	CD74/LAG3/LILRB4/RUNX3	4
BP	GO:0050728	negative regulation of inflammatory response	8/256	0.0173127	NOD2/CD200R1/PTPRC/HCK/TNFAIP8L2/SIGLEC10/AOAH/CST7	8
BP	GO:0140632	inflammasome complex assembly	3/256	0.0175814	GBP5/TLR6/AIM2	3
BP	GO:0043405	regulation of MAP kinase activity	8/256	0.0178243	TLR6/NOD2/FGD2/PTPN22/PTPRC/PTPN6/LAX1/PIK3R5	8
BP	GO:1901222	regulation of NIK/NF-kappaB signaling	6/256	0.0191981	SPI1/NOD2/PTPN22/CD27/LAPTM5/CD86	6
BP	GO:0002922	positive regulation of humoral immune response	3/256	0.0196149	NOD2/PTPRC/LTA	3
BP	GO:0032740	positive regulation of interleukin-17 production	3/256	0.0196149	NOD2/LY9/SLAMF6	3
BP	GO:0038095	Fc-epsilon receptor signaling pathway	3/256	0.0196149	VAV1/BTK/FCER1G	3
BP	GO:0050855	regulation of B cell receptor signaling pathway	3/256	0.0196149	PTPN22/LPXN/PRKCB	3
BP	GO:0090023	positive regulation of neutrophil chemotaxis	3/256	0.0196149	RAC2/CD74/NCKAP1L	3
BP	GO:0008037	cell recognition	9/256	0.019854	DOCK2/TRBC2/CRTAM/TRBC1/CLEC7A/CD5/EMB/CD6/CD226	9
BP	GO:0043123	positive regulation of I-kappaB kinase/NF-kappaB signaling	8/256	0.02063	TLR6/NOD2/CD74/CLEC7A/PRKCB/CASP1/CD4/FASLG	8
BP	GO:0002762	negative regulation of myeloid leukocyte differentiation	4/256	0.0209922	LILRB1/GPR55/C1QC/LILRB4	4
BP	GO:0014068	positive regulation of phosphatidylinositol 3-kinase signaling	5/256	0.0212995	HCST/PTPN6/NCF1/HCLS1/CCL5	5
BP	GO:0001911	negative regulation of leukocyte mediated cytotoxicity	3/256	0.0217209	LILRB1/PTPRC/NCKAP1L	3
BP	GO:0002438	acute inflammatory response to antigenic stimulus	3/256	0.0217209	FCGR1A/BTK/CD6	3
BP	GO:0031579	membrane raft organization	3/256	0.0217209	DOCK2/PTPRC/CD2	3
BP	GO:0098581	detection of external biotic stimulus	3/256	0.0217209	TLR6/NOD2/CLEC7A	3
BP	GO:0070231	T cell apoptotic process	4/256	0.022312	PDCD1/CD27/FASLG/CCL5	4
BP	GO:0007157	heterophilic cell-cell adhesion via plasma membrane cell adhesion molecules	4/256	0.0238628	CRTAM/JAML/ITGAL/CD6	4
BP	GO:0043277	apoptotic cell clearance	4/256	0.0238628	RAC2/RHOH/CD300LF/CCR2	4
BP	GO:0071675	regulation of mononuclear cell migration	6/256	0.0240449	SPI1/CD200R1/SPN/AIF1/CCR2/CCL5	6
BP	GO:0042832	defense response to protozoan	3/256	0.0240733	BATF/IRF4/CLEC7A	3
BP	GO:0001562	response to protozoan	3/256	0.0266576	BATF/IRF4/CLEC7A	3
BP	GO:0002719	negative regulation of cytokine production involved in immune response	3/256	0.0266576	CD96/LILRB1/LILRB4	3
BP	GO:0071624	positive regulation of granulocyte chemotaxis	3/256	0.0266576	RAC2/CD74/NCKAP1L	3
BP	GO:0010921	regulation of phosphatase activity	5/256	0.0269314	IFNG/CD33/PTPRC/PLEK/NCKAP1L	5
BP	GO:0050832	defense response to fungus	4/256	0.0270081	SPI1/ZBP1/CLEC4A/CLEC7A	4
BP	GO:0033674	positive regulation of kinase activity	14/256	0.0271612	TLR6/IFNG/NOD2/FGD2/CD74/LCP2/PTPRC/FCGR1A/NCF1/CD4/NCKAP1L/PIK3R5/CCL5/CD86	14
BP	GO:0031342	negative regulation of cell killing	3/256	0.029165	LILRB1/PTPRC/NCKAP1L	3
BP	GO:0048873	homeostasis of number of cells within a tissue	3/256	0.029165	CCR2/CORO1A/SASH3	3
BP	GO:0080111	DNA demethylation	3/256	0.029165	APOBEC3G/APOBEC3H/TOX	3
BP	GO:0090025	regulation of monocyte chemotaxis	3/256	0.029165	AIF1/CCR2/CCL5	3
BP	GO:0045620	negative regulation of lymphocyte differentiation	4/256	0.0303899	CD74/LAG3/LILRB4/RUNX3	4
BP	GO:1905517	macrophage migration	4/256	0.0303899	MCOLN2/CD200R1/CCR2/CCL5	4
BP	GO:0035023	regulation of Rho protein signal transduction	5/256	0.0306625	GPR65/P2RY10/GPR18/GPR174/GPR55	5
BP	GO:0002244	hematopoietic progenitor cell differentiation	6/256	0.0309407	SPI1/PTPRC/PLEK/BATF/PTPN6/ARL11	6
BP	GO:0061082	myeloid leukocyte cytokine production	3/256	0.0319028	LILRB1/CD74/LAPTM5	3
BP	GO:0001916	positive regulation of T cell mediated cytotoxicity	3/256	0.0342574	PTPRC/HLA-DRA/IL12RB1	3
BP	GO:0045671	negative regulation of osteoclast differentiation	3/256	0.0342574	LILRB1/GPR55/LILRB4	3
BP	GO:0001865	NK T cell differentiation	2/256	0.0342574	TOX/ITK	2
BP	GO:0002423	natural killer cell mediated immune response to tumor cell	2/256	0.0342574	CRTAM/CD226	2
BP	GO:0002676	regulation of chronic inflammatory response	2/256	0.0342574	LTA/CCL5	2
BP	GO:0033007	negative regulation of mast cell activation involved in immune response	2/256	0.0342574	PTPN6/CD84	2
BP	GO:0042368	vitamin D biosynthetic process	2/256	0.0342574	IFNG/GFI1	2
BP	GO:0043320	natural killer cell degranulation	2/256	0.0342574	CORO1A/UNC13D	2
BP	GO:0045348	positive regulation of MHC class II biosynthetic process	2/256	0.0342574	IFNG/CIITA	2
BP	GO:0045657	positive regulation of monocyte differentiation	2/256	0.0342574	CD74/CD4	2
BP	GO:0060368	regulation of Fc receptor mediated stimulatory signaling pathway	2/256	0.0342574	PTPRC/CD226	2
BP	GO:2000109	regulation of macrophage apoptotic process	2/256	0.0342574	NOD2/CCR5	2
BP	GO:0060191	regulation of lipase activity	5/256	0.0342574	GPR55/CCL5/PLCB2/CD86/ITK	5
BP	GO:0061097	regulation of protein tyrosine kinase activity	5/256	0.0342574	PTPRC/FCGR1A/NCF1/CCL5/LILRB4	5
BP	GO:0032970	regulation of actin filament-based process	12/256	0.0347766	WAS/RAC2/RHOH/GPR65/CARMIL2/PLEK/HCK/NCKAP1L/HCLS1/SH3BP1/CORO1A/TRPM2	12
BP	GO:0051048	negative regulation of secretion	7/256	0.0354145	SPI1/LILRB1/CD74/TIFAB/CCR2/NCKAP1L/CD84	7
BP	GO:0001782	B cell homeostasis	3/256	0.0372049	CD74/NCKAP1L/TNFSF13B	3
BP	GO:0035510	DNA dealkylation	3/256	0.0372049	APOBEC3G/APOBEC3H/TOX	3
BP	GO:0002711	positive regulation of T cell mediated immunity	4/256	0.03732	PTPRC/HLA-DRA/IL12RB1/SASH3	4
BP	GO:0030168	platelet activation	6/256	0.0385547	FERMT3/PLEK/PTPN6/VAV1/LCK/FCER1G	6
BP	GO:0035303	regulation of dephosphorylation	6/256	0.0385547	IFNG/CD33/LILRB2/PTPRC/PLEK/NCKAP1L	6
BP	GO:0043254	regulation of protein-containing complex assembly	12/256	0.0399222	GBP5/TLR6/IFNG/CARMIL2/PLEK/TMC8/HCK/LCP1/CLEC7A/NCKAP1L/HCLS1/CORO1A	12
BP	GO:0022604	regulation of cell morphogenesis	10/256	0.040061	RAC2/RHOH/FGD2/LST1/HCK/FMNL1/ITGB2/FGD3/CORO1A/UNC13D	10
BP	GO:0043304	regulation of mast cell degranulation	3/256	0.040061	RAC2/CD84/UNC13D	3
BP	GO:0071353	cellular response to interleukin-4	3/256	0.040061	CD300LF/CORO1A/IL2RG	3
BP	GO:1902624	positive regulation of neutrophil migration	3/256	0.040061	RAC2/CD74/NCKAP1L	3
BP	GO:0002357	defense response to tumor cell	2/256	0.0402866	SPI1/LAPTM5	2
BP	GO:0002604	regulation of dendritic cell antigen processing and presentation	2/256	0.0402866	NOD2/CD74	2
BP	GO:0046598	positive regulation of viral entry into host cell	2/256	0.0402866	CD74/CD4	2
BP	GO:0075294	positive regulation by symbiont of entry into host	2/256	0.0402866	CD74/CD4	2
BP	GO:0032874	positive regulation of stress-activated MAPK cascade	6/256	0.040658	SPI1/NOD2/SCIMP/CLEC7A/CD27/NCF1	6
BP	GO:0045428	regulation of nitric oxide biosynthetic process	4/256	0.0409299	TLR6/IFNG/AIF1/CLEC7A	4
BP	GO:0055094	response to lipoprotein particle	3/256	0.0430108	TLR6/ITGB2/FCER1G	3
BP	GO:0070229	negative regulation of lymphocyte apoptotic process	3/256	0.0430108	CD74/CD27/CCL5	3
BP	GO:0070304	positive regulation of stress-activated protein kinase signaling cascade	6/256	0.0432845	SPI1/NOD2/SCIMP/CLEC7A/CD27/NCF1	6
BP	GO:0070372	regulation of ERK1 and ERK2 cascade	10/256	0.0446814	NOD2/CD74/PTPN22/PTPRC/PTPN6/SCIMP/TBC1D10C/GPR55/CD4/CCL5	10
BP	GO:0070374	positive regulation of ERK1 and ERK2 cascade	8/256	0.0456476	NOD2/CD74/PTPN22/PTPRC/SCIMP/GPR55/CD4/CCL5	8
BP	GO:0048015	phosphatidylinositol-mediated signaling	7/256	0.0458617	HCST/PTPN6/NCF1/HCLS1/PIK3R5/CCL5/PLCB2	7
BP	GO:0045165	cell fate commitment	9/256	0.0458617	EOMES/BATF/SPN/IRF4/LY9/SLAMF6/IL12RB1/TOX/BCL11B	9
BP	GO:0051125	regulation of actin nucleation	3/256	0.0458617	WAS/CARMIL2/CORO1A	3
BP	GO:0070232	regulation of T cell apoptotic process	3/256	0.0458617	PDCD1/CD27/CCL5	3
BP	GO:0070670	response to interleukin-4	3/256	0.0458617	CD300LF/CORO1A/IL2RG	3
BP	GO:0002863	positive regulation of inflammatory response to antigenic stimulus	2/256	0.0458617	LTA/BTK	2
BP	GO:0006216	cytidine catabolic process	2/256	0.0458617	APOBEC3G/APOBEC3H	2
BP	GO:0009972	cytidine deamination	2/256	0.0458617	APOBEC3G/APOBEC3H	2
BP	GO:0016554	cytidine to uridine editing	2/256	0.0458617	APOBEC3G/APOBEC3H	2
BP	GO:0030656	regulation of vitamin metabolic process	2/256	0.0458617	IFNG/GFI1	2
BP	GO:0032490	detection of molecule of bacterial origin	2/256	0.0458617	TLR6/NOD2	2
BP	GO:0034135	regulation of toll-like receptor 2 signaling pathway	2/256	0.0458617	TLR6/NOD2	2
BP	GO:0034154	toll-like receptor 7 signaling pathway	2/256	0.0458617	PTPN22/SCIMP	2
BP	GO:0043312	neutrophil degranulation	2/256	0.0458617	SPI1/ITGB2	2
BP	GO:0043380	regulation of memory T cell differentiation	2/256	0.0458617	HLA-DRA/IL12RB1	2
BP	GO:0046087	cytidine metabolic process	2/256	0.0458617	APOBEC3G/APOBEC3H	2
BP	GO:0051639	actin filament network formation	2/256	0.0458617	CARMIL2/LCP1	2
BP	GO:1900227	positive regulation of NLRP3 inflammasome complex assembly	2/256	0.0458617	GBP5/TLR6	2
BP	GO:0045670	regulation of osteoclast differentiation	4/256	0.0461485	IFNG/LILRB1/GPR55/LILRB4	4
BP	GO:0050918	positive chemotaxis	4/256	0.0461485	CCR4/IL16/CORO1A/CCL5	4
BP	GO:0080164	regulation of nitric oxide metabolic process	4/256	0.0461485	TLR6/IFNG/AIF1/CLEC7A	4
BP	GO:0051051	negative regulation of transport	13/256	0.0466709	SPI1/CD33/LILRB1/CD74/LILRB2/CD300LF/TIFAB/TRAT1/CCR2/PRKCB/NCKAP1L/CORO1A/CD84	13
BP	GO:0031589	cell-substrate adhesion	11/256	0.0469363	RAC2/CD96/FERMT3/LPXN/CD3E/ITGB2/PARVG/MYO1G/ITGAL/CORO1A/UNC13D	11
BP	GO:0043087	regulation of GTPase activity	11/256	0.0469363	FGD2/GPR65/ARHGAP45/VAV1/GMIP/TBC1D10C/ARHGAP9/FGD3/SH3BP1/CCL5/RGS10	11
BP	GO:0007266	Rho protein signal transduction	6/256	0.0472937	WAS/GPR65/P2RY10/GPR18/GPR174/GPR55	6
BP	GO:0050869	negative regulation of B cell activation	3/256	0.0481023	TBC1D10C/BTK/LAPTM5	3
BP	GO:0019058	viral life cycle	10/256	0.0481905	CD74/CIITA/SELPLG/CXCR6/APOBEC3G/CD4/APOBEC3H/CCL5/CCR5/CD86	10
BP	GO:0110053	regulation of actin filament organization	9/256	0.0484275	WAS/GPR65/CARMIL2/PLEK/HCK/NCKAP1L/HCLS1/SH3BP1/CORO1A	9
BP	GO:1903900	regulation of viral life cycle	6/256	0.0485526	CD74/CIITA/APOBEC3G/CD4/APOBEC3H/CCL5	6
BP	GO:0048017	inositol lipid-mediated signaling	7/256	0.049047	HCST/PTPN6/NCF1/HCLS1/PIK3R5/CCL5/PLCB2	7
CC	GO:0042101	T cell receptor complex	48/262	4.00426e-52	TRAV5/TRAV16/TRBV6-5/TRBV7-6/TRAV21/TRBV2/TRAV8-3/TRAV8-6/TRAV12-2/CD3D/TRBV6-6/TRAV19/TRAV12-1/TRAV17/TRBV5-4/CD247/TRBV10-3/TRAV2/TRAT1/TRAV8-2/TRAV13-1/PTPN6/TRAC/CD8A/TRAV4/TRBC2/TRBV27/TRAV22/CD3E/TRBV3-1/TRAV3/TRBV20-1/TRAV29DV5/CD3G/TRBV12-4/TRAV8-4/TRBV9/CD4/TRBV28/TRBV7-9/TRBV19/TRBV29-1/CD8B/TRAV13-2/TRBV5-1/TRBV6-1/TRAV12-3/TRAV9-2	48
CC	GO:0098802	plasma membrane signaling receptor complex	53/262	4.78353e-41	TRAV5/TRAV16/TRBV6-5/TLR6/TRBV7-6/TRAV21/TRBV2/TRAV8-3/TRAV8-6/TRAV12-2/CD3D/TRBV6-6/TRAV19/TRAV12-1/TRAV17/TRBV5-4/CD247/TRBV10-3/TRAV2/TRAT1/TRAV8-2/TRAV13-1/PTPN6/TRAC/CD8A/TRAV4/TRBC2/TRBV27/IL2RB/TRAV22/CD3E/TRBV3-1/ITGB2/TRAV3/TRBV20-1/TRAV29DV5/CD3G/TRBV12-4/TRAV8-4/TRBV9/ITGAL/CD4/TRBV28/IL12RB1/TRBV7-9/TRBV19/TRBV29-1/CD8B/TRAV13-2/TRBV5-1/TRBV6-1/TRAV12-3/TRAV9-2	53
CC	GO:0009897	external side of plasma membrane	45/262	2.42714e-24	CXCL9/CD33/LILRB1/CD69/CD74/LAG3/CD3D/IL21R/CD48/CD200R1/PTPRC/CCR4/CD2/PDCD1/CXCR3/CD8A/CXCR6/TRBC2/IL2RB/SPN/CD3E/ITGB2/CLEC4A/CCR2/TRBC1/CLEC7A/CD3G/CD27/ITGAL/CD4/LY9/SLAMF6/FASLG/FCER1G/IL12RB1/CD84/CCR5/TLR8/CD5/IL2RG/CD86/MICB/CD6/CD226/TNFRSF9	45
CC	GO:0042105	alpha-beta T cell receptor complex	8/262	7.50338e-12	CD3D/CD247/PTPN6/TRAC/TRBC2/CD3E/CD3G/TRBV19	8
CC	GO:0001772	immunological synapse	11/262	4.21725e-10	RHOH/GZMA/SCIMP/CD3E/CRTAM/HLA-DRA/LCK/CORO1A/CD53/CD37/CD6	11
CC	GO:0042613	MHC class II protein complex	8/262	6.87497e-10	CD74/HLA-DMA/HLA-DPA1/HLA-DRA/HLA-DQA1/HLA-DOB/HLA-DPB1/HLA-DMB	8
CC	GO:0042611	MHC protein complex	8/262	2.38981e-08	CD74/HLA-DMA/HLA-DPA1/HLA-DRA/HLA-DQA1/HLA-DOB/HLA-DPB1/HLA-DMB	8
CC	GO:0030669	clathrin-coated endocytic vesicle membrane	9/262	1.24606e-05	CD74/CD3D/HLA-DPA1/FCGR1A/HLA-DRA/HLA-DQA1/CD3G/CD4/HLA-DPB1	9
CC	GO:0030139	endocytic vesicle	18/262	2.02702e-05	WAS/RAC2/TLR6/NOD2/CD74/CD3D/HLA-DPA1/FCGR1A/CTSS/SCIMP/FMNL1/HLA-DRA/HLA-DQA1/CD3G/NCF1/CD4/CORO1A/HLA-DPB1	18
CC	GO:0001891	phagocytic cup	6/262	3.25645e-05	BIN2/AIF1/LCP1/MYO1G/SH3BP1/CORO1A	6
CC	GO:0045334	clathrin-coated endocytic vesicle	9/262	6.69112e-05	CD74/CD3D/HLA-DPA1/FCGR1A/HLA-DRA/HLA-DQA1/CD3G/CD4/HLA-DPB1	9
CC	GO:0045121	membrane raft	16/262	0.000144465	TLR6/RGS19/LCP2/CD48/PTPRC/CD2/LAT2/CD8A/SELPLG/HCK/ITGB2/BTK/LCK/CD4/FASLG/CD226	16
CC	GO:0098857	membrane microdomain	16/262	0.000144465	TLR6/RGS19/LCP2/CD48/PTPRC/CD2/LAT2/CD8A/SELPLG/HCK/ITGB2/BTK/LCK/CD4/FASLG/CD226	16
CC	GO:0030666	endocytic vesicle membrane	12/262	0.000181289	RAC2/TLR6/CD74/CD3D/HLA-DPA1/FCGR1A/HLA-DRA/HLA-DQA1/CD3G/CD4/CORO1A/HLA-DPB1	12
CC	GO:0070820	tertiary granule	11/262	0.000183241	LAIR1/CD33/LILRB2/PTPN6/CTSS/TBC1D10C/ITGB2/NCKAP1L/FCER1G/CD53/TRPM2	11
CC	GO:0030665	clathrin-coated vesicle membrane	9/262	0.000228595	CD74/CD3D/HLA-DPA1/FCGR1A/HLA-DRA/HLA-DQA1/CD3G/CD4/HLA-DPB1	9
CC	GO:0001931	uropod	4/262	0.000228595	PSTPIP1/SCIMP/SELPLG/SPN	4
CC	GO:0031254	cell trailing edge	4/262	0.000228595	PSTPIP1/SCIMP/SELPLG/SPN	4
CC	GO:0005884	actin filament	9/262	0.000228595	WAS/RAC2/PSTPIP1/WIPF1/HCK/AIF1/LCP1/HCLS1/CORO1A	9
CC	GO:0071556	integral component of lumenal side of endoplasmic reticulum membrane	5/262	0.000366786	CD74/HLA-DPA1/HLA-DRA/HLA-DQA1/HLA-DPB1	5
CC	GO:0098553	lumenal side of endoplasmic reticulum membrane	5/262	0.000366786	CD74/HLA-DPA1/HLA-DRA/HLA-DQA1/HLA-DPB1	5
CC	GO:0015629	actin cytoskeleton	19/262	0.000424795	WAS/RAC2/PSTPIP1/FYB1/BIN2/FERMT3/CARMIL2/WIPF1/MYO1F/HCK/LPXN/AIF1/LCP1/PARVG/MYO1G/PRKCB/HCLS1/CORO1A/LSP1	19
CC	GO:0070821	tertiary granule membrane	7/262	0.00048287	LAIR1/CD33/LILRB2/ITGB2/FCER1G/CD53/TRPM2	7
CC	GO:0030136	clathrin-coated vesicle	11/262	0.000491509	CD74/RGS19/CD3D/HLA-DPA1/FCGR1A/HLA-DRA/HLA-DQA1/CD3G/CD4/HLA-DPB1/UNC13D	11
CC	GO:0098576	lumenal side of membrane	5/262	0.000788861	CD74/HLA-DPA1/HLA-DRA/HLA-DQA1/HLA-DPB1	5
CC	GO:0045335	phagocytic vesicle	9/262	0.000802869	WAS/RAC2/TLR6/NOD2/CTSS/SCIMP/FMNL1/NCF1/CORO1A	9
CC	GO:0101003	ficolin-1-rich granule membrane	6/262	0.00122921	LILRB2/TBC1D10C/ITGB2/NCKAP1L/FCER1G/TRPM2	6
CC	GO:0030667	secretory granule membrane	13/262	0.0022814	LAIR1/CD33/LILRB2/PTPRC/CD38/TBC1D10C/ITGB2/ITGAL/NCKAP1L/FCER1G/CD53/TRPM2/SELL	13
CC	GO:0009898	cytoplasmic side of plasma membrane	9/262	0.00327729	SLA/PTPN22/CARMIL2/PTPRC/CD2/HCK/PTPN7/LCK/LILRB4	9
CC	GO:0002102	podosome	4/262	0.00389707	BIN2/FERMT3/LPXN/LCP1	4
CC	GO:0030662	coated vesicle membrane	9/262	0.00411135	CD74/CD3D/HLA-DPA1/FCGR1A/HLA-DRA/HLA-DQA1/CD3G/CD4/HLA-DPB1	9
CC	GO:0001726	ruffle	9/262	0.00414822	FGD2/CARMIL2/WIPF1/PLEK/ARHGAP45/SCIMP/AIF1/LCP1/FGD3	9
CC	GO:0098562	cytoplasmic side of membrane	9/262	0.00742031	SLA/PTPN22/CARMIL2/PTPRC/CD2/HCK/PTPN7/LCK/LILRB4	9
CC	GO:0035579	specific granule membrane	6/262	0.00814563	LAIR1/CD33/ITGB2/ITGAL/CD53/TRPM2	6
CC	GO:0042581	specific granule	8/262	0.00814563	LAIR1/CD33/DOCK2/PTPN6/ITGB2/ITGAL/CD53/TRPM2	8
CC	GO:0012507	ER to Golgi transport vesicle membrane	5/262	0.00814563	CD74/HLA-DPA1/HLA-DRA/HLA-DQA1/HLA-DPB1	5
CC	GO:0031252	cell leading edge	14/262	0.00833768	RAC2/PSTPIP1/FGD2/CARMIL2/WIPF1/PLEK/ARHGAP45/SCIMP/AIF1/LCP1/FGD3/MYO1G/SH3BP1/CORO1A	14
CC	GO:0030027	lamellipodium	9/262	0.00883384	RAC2/PSTPIP1/FGD2/CARMIL2/AIF1/FGD3/MYO1G/SH3BP1/CORO1A	9
CC	GO:0030135	coated vesicle	11/262	0.00994513	CD74/RGS19/CD3D/HLA-DPA1/FCGR1A/HLA-DRA/HLA-DQA1/CD3G/CD4/HLA-DPB1/UNC13D	11
CC	GO:0101002	ficolin-1-rich granule	8/262	0.0180403	BIN2/LILRB2/CTSS/TBC1D10C/ITGB2/NCKAP1L/FCER1G/TRPM2	8
CC	GO:0044853	plasma membrane raft	6/262	0.0207143	LCP2/CD8A/SELPLG/HCK/ITGB2/FASLG	6
CC	GO:0097197	tetraspanin-enriched microdomain	2/262	0.0364483	SAMHD1/SCIMP	2
CC	GO:0005774	vacuolar membrane	13/262	0.036635	RUBCNL/CD74/HLA-DMA/HLA-DPA1/HLA-DRA/HLA-DQA1/LAPTM5/HLA-DOB/HLA-DPB1/TRPM2/TLR8/HLA-DMB/TRAF3IP3	13
CC	GO:0005765	lysosomal membrane	12/262	0.0383334	CD74/HLA-DMA/HLA-DPA1/HLA-DRA/HLA-DQA1/LAPTM5/HLA-DOB/HLA-DPB1/TRPM2/TLR8/HLA-DMB/TRAF3IP3	12
CC	GO:0098852	lytic vacuole membrane	12/262	0.0383334	CD74/HLA-DMA/HLA-DPA1/HLA-DRA/HLA-DQA1/LAPTM5/HLA-DOB/HLA-DPB1/TRPM2/TLR8/HLA-DMB/TRAF3IP3	12
CC	GO:0030134	COPII-coated ER to Golgi transport vesicle	5/262	0.0383334	CD74/HLA-DPA1/HLA-DRA/HLA-DQA1/HLA-DPB1	5
CC	GO:0031256	leading edge membrane	7/262	0.0407186	FGD2/PLEK/ARHGAP45/SCIMP/AIF1/LCP1/MYO1G	7
CC	GO:0032587	ruffle membrane	5/262	0.0417701	FGD2/PLEK/ARHGAP45/AIF1/LCP1	5
CC	GO:0032588	trans-Golgi network membrane	5/262	0.0462945	CD74/HLA-DPA1/HLA-DRA/HLA-DQA1/HLA-DPB1	5
MF	GO:0140375	immune receptor activity	21/228	4.20883e-14	IL10RA/LILRB1/CD74/IL21R/LILRB2/CD200R1/CCR4/HLA-DPA1/FCGR1A/CXCR3/CXCR6/IL2RB/CCR2/HLA-DRA/HLA-DQA1/CD4/FCER1G/HLA-DOB/IL12RB1/CCR5/IL2RG	21
MF	GO:0023023	MHC protein complex binding	12/228	1.31364e-12	LILRB1/CD74/HLA-DMA/LILRB2/HLA-DPA1/CD8A/HLA-DRA/HLA-DQA1/CD4/HLA-DOB/HLA-DPB1/HLA-DMB	12
MF	GO:0042605	peptide antigen binding	12/228	1.31364e-12	TRAV12-2/TRAV19/TRAV12-1/HLA-DPA1/TRAV29DV5/HLA-DRA/HLA-DQA1/TRAV8-4/TRBV28/TRBV7-9/HLA-DPB1/TRAV12-3	12
MF	GO:0042287	MHC protein binding	12/228	5.56945e-12	LILRB1/CD74/LAG3/TRAV19/LILRB2/CD8A/TRAV29DV5/CLEC7A/TRAV8-4/CD4/TRBV7-9/CD8B	12
MF	GO:0023026	MHC class II protein complex binding	9/228	1.29714e-09	CD74/HLA-DMA/HLA-DPA1/HLA-DRA/HLA-DQA1/CD4/HLA-DOB/HLA-DPB1/HLA-DMB	9
MF	GO:0003823	antigen binding	16/228	2.54114e-08	LAG3/TRAV12-2/TRAV19/TRAV12-1/CD48/HLA-DPA1/TRBC2/TRAV29DV5/HLA-DRA/TRBC1/HLA-DQA1/TRAV8-4/TRBV28/TRBV7-9/HLA-DPB1/TRAV12-3	16
MF	GO:0019955	cytokine binding	14/228	9.86499e-08	IL10RA/IL18BP/CD74/CCR4/CXCR3/TMC8/CXCR6/IL2RB/CCR2/CD4/IL12RB1/CCR5/IL2RG/TNFRSF9	14
MF	GO:0004896	cytokine receptor activity	12/228	9.86499e-08	IL10RA/CD74/IL21R/CCR4/CXCR3/CXCR6/IL2RB/CCR2/CD4/IL12RB1/CCR5/IL2RG	12
MF	GO:0042608	T cell receptor binding	5/228	2.1305e-06	DOCK2/CD3E/HLA-DRA/CD3G/LCK	5
MF	GO:0042277	peptide binding	18/228	3.30609e-06	TLR6/NOD2/CD74/TRAV12-2/TRAV19/TRAV12-1/LILRB2/HLA-DPA1/ITGB2/C1QA/TRAV29DV5/HLA-DRA/HLA-DQA1/TRAV8-4/TRBV28/TRBV7-9/HLA-DPB1/TRAV12-3	18
MF	GO:0042169	SH2 domain binding	7/228	1.61301e-05	SIT1/LILRB1/PTPN6/LAT2/LAX1/LCK/SIGLEC10	7
MF	GO:0033218	amide binding	19/228	1.61301e-05	TLR6/NOD2/CD74/TRAV12-2/TRAV19/TRAV12-1/LILRB2/CD300LF/HLA-DPA1/ITGB2/C1QA/TRAV29DV5/HLA-DRA/HLA-DQA1/TRAV8-4/TRBV28/TRBV7-9/HLA-DPB1/TRAV12-3	19
MF	GO:0032395	MHC class II receptor activity	4/228	0.000100199	HLA-DPA1/HLA-DRA/HLA-DQA1/HLA-DOB	4
MF	GO:0016493	C-C chemokine receptor activity	5/228	0.000160335	CCR4/CXCR3/CXCR6/CCR2/CCR5	5
MF	GO:0019957	C-C chemokine binding	5/228	0.000187127	CCR4/CXCR3/CXCR6/CCR2/CCR5	5
MF	GO:0030695	GTPase regulator activity	19/228	0.000191101	WAS/RHOH/FGD2/DOCK2/ARHGAP45/TAGAP/VAV1/GMIP/TBC1D10C/GPSM3/ARHGAP9/FGD3/NCKAP1L/SH3BP1/DEF6/ARHGAP30/RGS10/RGS18/CYTH4	19
MF	GO:0060589	nucleoside-triphosphatase regulator activity	19/228	0.000191101	WAS/RHOH/FGD2/DOCK2/ARHGAP45/TAGAP/VAV1/GMIP/TBC1D10C/GPSM3/ARHGAP9/FGD3/NCKAP1L/SH3BP1/DEF6/ARHGAP30/RGS10/RGS18/CYTH4	19
MF	GO:0001637	G protein-coupled chemoattractant receptor activity	5/228	0.000224061	CCR4/CXCR3/CXCR6/CCR2/CCR5	5
MF	GO:0004950	chemokine receptor activity	5/228	0.000224061	CCR4/CXCR3/CXCR6/CCR2/CCR5	5
MF	GO:0015026	coreceptor activity	6/228	0.000340556	CD8A/CXCR6/CD4/CCR5/CD8B/CD86	6
MF	GO:0017124	SH3 domain binding	9/228	0.000352388	WAS/PTPN22/WIPF1/PTPN6/CD3E/NCF1/HCLS1/SH3BP1/SH2D2A	9
MF	GO:0019956	chemokine binding	5/228	0.000650586	CCR4/CXCR3/CXCR6/CCR2/CCR5	5
MF	GO:0042288	MHC class I protein binding	4/228	0.00175512	LILRB1/LILRB2/CD8A/CD8B	4
MF	GO:0043274	phospholipase binding	4/228	0.0020164	WAS/TESPA1/BTK/LCK	4
MF	GO:0043325	phosphatidylinositol-3,4-bisphosphate binding	4/228	0.00489839	PLEK/DAPP1/MYO1G/NCF1	4
MF	GO:0005164	tumor necrosis factor receptor binding	4/228	0.00611998	TNFSF8/LTA/FASLG/TNFSF13B	4
MF	GO:0016004	phospholipase activator activity	3/228	0.00655734	BTK/LCK/CCL5	3
MF	GO:0005096	GTPase activator activity	11/228	0.00657425	DOCK2/ARHGAP45/TAGAP/GMIP/TBC1D10C/ARHGAP9/NCKAP1L/SH3BP1/ARHGAP30/RGS10/RGS18	11
MF	GO:0060229	lipase activator activity	3/228	0.00922218	BTK/LCK/CCL5	3
MF	GO:0003779	actin binding	14/228	0.0114492	WAS/PSTPIP1/NOD2/WIPF1/MYO1F/AIF1/FMNL1/LCP1/PARVG/MYO1G/HCLS1/CORO1A/LSP1/CCR5	14
MF	GO:0005547	phosphatidylinositol-3,4,5-trisphosphate binding	4/228	0.0124187	DAPP1/ARHGAP9/BTK/MYO1G	4
MF	GO:0001784	phosphotyrosine residue binding	4/228	0.0187275	PTPN6/VAV1/HCK/LCK	4
MF	GO:0005126	cytokine receptor binding	10/228	0.0187275	CXCL9/IFNG/CD300LF/TNFSF8/LTA/CCR2/FASLG/IL12RB1/CCL5/TNFSF13B	10
MF	GO:0004715	non-membrane spanning protein tyrosine kinase activity	4/228	0.0193582	HCK/BTK/LCK/ITK	4
MF	GO:0032813	tumor necrosis factor receptor superfamily binding	4/228	0.0248605	TNFSF8/LTA/FASLG/TNFSF13B	4
MF	GO:0001540	amyloid-beta binding	5/228	0.0248605	TLR6/CD74/LILRB2/ITGB2/C1QA	5
MF	GO:0035591	signaling adaptor activity	5/228	0.0248605	TRAT1/CD3E/CD3G/SLA2/DOK2	5
MF	GO:0005178	integrin binding	7/228	0.0248605	FERMT3/ICAM3/ITGB2/LCP1/JAML/ITGAL/CD226	7
MF	GO:0030159	signaling receptor complex adaptor activity	4/228	0.0248605	TRAT1/CD3E/CD3G/DOK2	4
MF	GO:0004435	phosphatidylinositol phospholipase C activity	3/228	0.0276469	CCL5/CCR5/PLCB2	3
MF	GO:0038187	pattern recognition receptor activity	3/228	0.0276469	NOD2/CLEC7A/TLR8	3
MF	GO:0045309	protein phosphorylated amino acid binding	4/228	0.0318757	PTPN6/VAV1/HCK/LCK	4
MF	GO:0003953	NAD+ nucleosidase activity	3/228	0.0318757	TLR6/CD38/TLR8	3
MF	GO:0004629	phospholipase C activity	3/228	0.0318757	CCL5/CCR5/PLCB2	3
MF	GO:0051015	actin filament binding	8/228	0.0337007	PSTPIP1/MYO1F/AIF1/FMNL1/LCP1/MYO1G/HCLS1/CORO1A	8
MF	GO:0043548	phosphatidylinositol 3-kinase binding	3/228	0.0337007	HCST/LCK/CORO1A	3
MF	GO:0005543	phospholipid binding	13/228	0.034384	NCF1B/FGD2/RUBCNL/BIN2/CARMIL2/CD300LF/DAPP1/ARHGAP9/BTK/MYO1G/NCF1/PLCB2/SNX20	13
MF	GO:1901981	phosphatidylinositol phosphate binding	7/228	0.0369443	FGD2/RUBCNL/DAPP1/ARHGAP9/BTK/MYO1G/SNX20	7
MF	GO:0016176	superoxide-generating NADPH oxidase activator activity	2/228	0.0369443	NCF1B/NCF1	2
MF	GO:0047844	deoxycytidine deaminase activity	2/228	0.0369443	APOBEC3G/APOBEC3H	2
MF	GO:0030246	carbohydrate binding	9/228	0.0374706	CD33/CLECL1/CD69/CD72/CLEC4A/HLA-DRA/CLEC7A/SIGLEC10/SELL	9
MF	GO:0035091	phosphatidylinositol binding	9/228	0.0393917	NCF1B/FGD2/RUBCNL/DAPP1/ARHGAP9/BTK/MYO1G/NCF1/SNX20	9
MF	GO:0019239	deaminase activity	3/228	0.0414699	ZBP1/APOBEC3G/APOBEC3H	3
MF	GO:0019864	IgG binding	2/228	0.0414699	FCGR1A/FCER1G	2
MF	GO:0005125	cytokine activity	8/228	0.0467623	CXCL9/IFNG/TNFSF8/LTA/IL16/FASLG/CCL5/TNFSF13B	8
MF	GO:0004126	cytidine deaminase activity	2/228	0.0467623	APOBEC3G/APOBEC3H	2
MF	GO:0032396	inhibitory MHC class I receptor activity	2/228	0.0467623	LILRB1/LILRB2	2
MF	GO:0016814	hydrolase activity, acting on carbon-nitrogen (but not peptide) bonds, in cyclic amidines	3/228	0.0490211	ZBP1/APOBEC3G/APOBEC3H	3
KEGG	hsa04514	Cell adhesion molecules	24/128	2.09938e-15	ICOS/HLA-DMA/PTPRC/HLA-DPA1/CD2/PDCD1/CD8A/SELPLG/ICAM3/SPN/ITGB2/HLA-DRA/HLA-DQA1/ITGAL/CD4/HLA-DOB/HLA-DPB1/TIGIT/SELL/CD8B/CD86/HLA-DMB/CD6/CD226	24
KEGG	hsa04640	Hematopoietic cell lineage	20/128	2.30541e-15	CD33/CD3D/HLA-DMA/CD7/HLA-DPA1/FCGR1A/CD2/CD8A/CD38/CD3E/HLA-DRA/HLA-DQA1/CD3G/CD4/HLA-DOB/HLA-DPB1/CD37/CD8B/CD5/HLA-DMB	20
KEGG	hsa04658	Th1 and Th2 cell differentiation	18/128	1.15731e-13	IFNG/CD3D/HLA-DMA/HLA-DPA1/CD247/IL2RB/CD3E/HLA-DRA/HLA-DQA1/CD3G/LCK/CD4/HLA-DOB/IL12RB1/HLA-DPB1/IL2RG/HLA-DMB/RUNX3	18
KEGG	hsa04659	Th17 cell differentiation	19/128	1.15731e-13	IFNG/CD3D/IL21R/HLA-DMA/HLA-DPA1/CD247/IL2RB/CD3E/IRF4/HLA-DRA/HLA-DQA1/CD3G/LCK/CD4/HLA-DOB/IL12RB1/HLA-DPB1/IL2RG/HLA-DMB	19
KEGG	hsa04660	T cell receptor signaling pathway	17/128	1.06126e-11	IFNG/ICOS/CD3D/LCP2/PTPRC/CD247/PDCD1/PTPN6/VAV1/CD8A/CD3E/CD3G/LCK/CD4/CD8B/GRAP2/ITK	17
KEGG	hsa05152	Tuberculosis	20/128	1.10925e-10	IL10RA/TLR6/IFNG/NOD2/CD74/HLA-DMA/HLA-DPA1/FCGR1A/CTSS/CIITA/ITGB2/HLA-DRA/CLEC7A/HLA-DQA1/FCER1G/HLA-DOB/CORO1A/LSP1/HLA-DPB1/HLA-DMB	20
KEGG	hsa05340	Primary immunodeficiency	11/128	1.87214e-10	ICOS/CD3D/PTPRC/CIITA/CD8A/CD3E/BTK/LCK/CD4/CD8B/IL2RG	11
KEGG	hsa04612	Antigen processing and presentation	14/128	2.47247e-10	IFNG/CD74/HLA-DMA/HLA-DPA1/CTSS/CIITA/CD8A/HLA-DRA/HLA-DQA1/CD4/HLA-DOB/HLA-DPB1/CD8B/HLA-DMB	14
KEGG	hsa04940	Type I diabetes mellitus	11/128	6.51423e-10	IFNG/HLA-DMA/HLA-DPA1/LTA/HLA-DRA/HLA-DQA1/FASLG/HLA-DOB/HLA-DPB1/CD86/HLA-DMB	11
KEGG	hsa05140	Leishmaniasis	13/128	2.43542e-09	IFNG/HLA-DMA/HLA-DPA1/FCGR1A/PTPN6/ITGB2/HLA-DRA/HLA-DQA1/NCF1/PRKCB/HLA-DOB/HLA-DPB1/HLA-DMB	13
KEGG	hsa04650	Natural killer cell mediated cytotoxicity	16/128	2.43542e-09	RAC2/IFNG/HCST/LCP2/CD48/CD247/PTPN6/VAV1/SH2D1A/ITGB2/LCK/PRKCB/ITGAL/FASLG/FCER1G/MICB	16
KEGG	hsa05330	Allograft rejection	10/128	2.80484e-09	IFNG/HLA-DMA/HLA-DPA1/HLA-DRA/HLA-DQA1/FASLG/HLA-DOB/HLA-DPB1/CD86/HLA-DMB	10
KEGG	hsa05150	Staphylococcus aureus infection	14/128	2.80484e-09	HLA-DMA/HLA-DPA1/FCGR1A/SELPLG/ITGB2/C1QA/HLA-DRA/HLA-DQA1/ITGAL/HLA-DOB/HLA-DPB1/C1QC/HLA-DMB/C1QB	14
KEGG	hsa05321	Inflammatory bowel disease	12/128	3.18847e-09	IFNG/NOD2/IL21R/HLA-DMA/HLA-DPA1/HLA-DRA/HLA-DQA1/HLA-DOB/IL12RB1/HLA-DPB1/IL2RG/HLA-DMB	12
KEGG	hsa05332	Graft-versus-host disease	10/128	6.90981e-09	IFNG/HLA-DMA/HLA-DPA1/HLA-DRA/HLA-DQA1/FASLG/HLA-DOB/HLA-DPB1/CD86/HLA-DMB	10
KEGG	hsa05416	Viral myocarditis	11/128	1.68755e-08	RAC2/HLA-DMA/HLA-DPA1/ITGB2/HLA-DRA/HLA-DQA1/ITGAL/HLA-DOB/HLA-DPB1/CD86/HLA-DMB	11
KEGG	hsa05323	Rheumatoid arthritis	13/128	1.68755e-08	IFNG/HLA-DMA/HLA-DPA1/ITGB2/HLA-DRA/HLA-DQA1/ITGAL/HLA-DOB/HLA-DPB1/CCL5/TNFSF13B/CD86/HLA-DMB	13
KEGG	hsa04672	Intestinal immune network for IgA production	10/128	2.93118e-08	ICOS/HLA-DMA/HLA-DPA1/HLA-DRA/HLA-DQA1/HLA-DOB/HLA-DPB1/TNFSF13B/CD86/HLA-DMB	10
KEGG	hsa04060	Cytokine-cytokine receptor interaction	21/128	4.30437e-08	IL10RA/CXCL9/IFNG/IL21R/TNFSF8/CCR4/LTA/CXCR3/CXCR6/IL2RB/CCR2/CD27/CD4/IL16/FASLG/IL12RB1/CCL5/CCR5/TNFSF13B/IL2RG/TNFRSF9	21
KEGG	hsa04062	Chemokine signaling pathway	17/128	5.42525e-08	WAS/RAC2/CXCL9/DOCK2/CCR4/CXCR3/VAV1/CXCR6/HCK/CCR2/NCF1/PRKCB/PIK3R5/CCL5/CCR5/PLCB2/ITK	17
KEGG	hsa05166	Human T-cell leukemia virus 1 infection	18/128	7.25581e-08	SPI1/CD3D/HLA-DMA/HLA-DPA1/LTA/IL2RB/CD3E/ITGB2/HLA-DRA/HLA-DQA1/CD3G/LCK/ITGAL/CD4/HLA-DOB/HLA-DPB1/IL2RG/HLA-DMB	18
KEGG	hsa05310	Asthma	8/128	1.328e-07	HLA-DMA/HLA-DPA1/HLA-DRA/HLA-DQA1/FCER1G/HLA-DOB/HLA-DPB1/HLA-DMB	8
KEGG	hsa05142	Chagas disease	12/128	3.98718e-07	TLR6/IFNG/CD3D/CD247/CD3E/C1QA/CD3G/FASLG/CCL5/C1QC/PLCB2/C1QB	12
KEGG	hsa04145	Phagosome	14/128	6.587e-07	TLR6/HLA-DMA/HLA-DPA1/FCGR1A/CTSS/ITGB2/HLA-DRA/CLEC7A/HLA-DQA1/NCF1/HLA-DOB/CORO1A/HLA-DPB1/HLA-DMB	14
KEGG	hsa05320	Autoimmune thyroid disease	9/128	7.30945e-07	HLA-DMA/HLA-DPA1/HLA-DRA/HLA-DQA1/FASLG/HLA-DOB/HLA-DPB1/CD86/HLA-DMB	9
KEGG	hsa05145	Toxoplasmosis	12/128	1.00999e-06	IL10RA/IFNG/HLA-DMA/HLA-DPA1/CIITA/HLA-DRA/HLA-DQA1/PIK3R5/HLA-DOB/HLA-DPB1/CCR5/HLA-DMB	12
KEGG	hsa05322	Systemic lupus erythematosus	13/128	1.12068e-06	IFNG/HLA-DMA/HLA-DPA1/FCGR1A/C1QA/HLA-DRA/HLA-DQA1/HLA-DOB/HLA-DPB1/C1QC/CD86/HLA-DMB/C1QB	13
KEGG	hsa04662	B cell receptor signaling pathway	10/128	3.1691e-06	RAC2/LILRB1/LILRB2/DAPP1/PTPN6/VAV1/CD72/BTK/PRKCB/LILRB4	10
KEGG	hsa05235	PD-L1 expression and PD-1 checkpoint pathway in cancer	10/128	6.62959e-06	IFNG/CD3D/BATF/CD247/PDCD1/PTPN6/CD3E/CD3G/LCK/CD4	10
KEGG	hsa05164	Influenza A	13/128	1.40979e-05	IFNG/HLA-DMA/HLA-DPA1/CIITA/HLA-DRA/HLA-DQA1/PRKCB/CASP1/FASLG/HLA-DOB/HLA-DPB1/CCL5/HLA-DMB	13
KEGG	hsa05169	Epstein-Barr virus infection	14/128	1.64824e-05	CD3D/HLA-DMA/HLA-DPA1/CD247/CD3E/BTK/HLA-DRA/HLA-DQA1/CD3G/ITGAL/HLA-DOB/HLA-DPB1/HLA-DMB/RUNX3	14
KEGG	hsa04061	Viral protein interaction with cytokine and cytokine receptor	10/128	1.76822e-05	IL10RA/CXCL9/CCR4/LTA/CXCR3/IL2RB/CCR2/CCL5/CCR5/IL2RG	10
KEGG	hsa04380	Osteoclast differentiation	11/128	2.43644e-05	SPI1/IFNG/LILRB1/LCP2/LILRB2/SIRPG/FCGR1A/BTK/NCF1/LCK/LILRB4	11
KEGG	hsa05135	Yersinia infection	11/128	4.5662e-05	WAS/RAC2/FYB1/LCP2/WIPF1/VAV1/CD8A/LCK/CASP1/CD4/CD8B	11
KEGG	hsa04670	Leukocyte transendothelial migration	9/128	0.000341679	RAC2/RHOH/RASSF5/VAV1/ITGB2/NCF1/PRKCB/ITGAL/ITK	9
KEGG	hsa05170	Human immunodeficiency virus 1 infection	12/128	0.000549322	RAC2/CD3D/SAMHD1/CD247/CD3E/CD3G/APOBEC3G/PRKCB/CD4/FASLG/APOBEC3H/CCR5	12
KEGG	hsa04666	Fc gamma R-mediated phagocytosis	8/128	0.000608781	WAS/RAC2/PTPRC/FCGR1A/VAV1/HCK/NCF1/PRKCB	8
KEGG	hsa04613	Neutrophil extracellular trap formation	11/128	0.000830961	RAC2/FCGR1A/SELPLG/ITGB2/CLEC7A/NCF1/PRKCB/CASP1/ITGAL/PLCB2/TLR8	11
KEGG	hsa05143	African trypanosomiasis	4/128	0.0111862	IFNG/PRKCB/FASLG/PLCB2	4
KEGG	hsa03250	Viral life cycle - HIV-1	5/128	0.0127251	SAMHD1/APOBEC3G/CD4/APOBEC3H/CCR5	5
KEGG	hsa05130	Pathogenic Escherichia coli infection	9/128	0.0154936	WIPF1/PTPN6/MYO1F/MYO1G/CASP1/NCKAP1L/HCLS1/FASLG/CYTH4	9
KEGG	hsa04664	Fc epsilon RI signaling pathway	5/128	0.0168912	RAC2/LCP2/VAV1/BTK/FCER1G	5
KEGG	hsa04015	Rap1 signaling pathway	9/128	0.0224156	RAC2/FYB1/LCP2/RASSF5/VAV1/ITGB2/PRKCB/ITGAL/PLCB2	9
KEGG	hsa05133	Pertussis	5/128	0.0258789	ITGB2/C1QA/CASP1/C1QC/C1QB	5
KEGG	hsa04621	NOD-like receptor signaling pathway	8/128	0.0311881	GBP5/PSTPIP1/NOD2/CASP1/AIM2/CCL5/PLCB2/TRPM2	8
KEGG	hsa04611	Platelet activation	6/128	0.0487086	FERMT3/LCP2/BTK/PIK3R5/FCER1G/PLCB2	6
KEGG	hsa04630	JAK-STAT signaling pathway	7/128	0.0493581	IL10RA/IFNG/IL21R/PTPN6/IL2RB/IL12RB1/IL2RG	7
The threshold for GO/KEGG analysis iwas P. adj<0.05. The threshold for Gene count with default setting was >1. SLAMPF, signaling lymphocyte activation molecule family; GO, Gene Ontology; KEGG, KEGG, Kyoto Encyclopedia of Genes and Genomes; BP, biological process; CC, cellular component; MF, molecular function.
